# Supplementary material for: The influence of the alkoxy substituent length on the crystal structures of Tc(v) complexes with pyrazine
Source: Royal Society of Chemistry journal article supplement (doi:10.1039/d4ce00029c), 2024-01-01
Supplement: d4ce00029c1.pdf [file d4ce00029c1.pdf]

## Electronic supplementary materials for the paper

### The influence of the alkoxy substituent length on the crystal structures of Tc(V) complexes with pyrazine

Anton P. Novikov,\* Mikhail A. Volkov

*Frumkin Institute of Physical Chemistry and Electrochemistry, Russian Academy  
of Sciences, 31 Bldg 4, Leninsky prosp., Moscow, 119071, Russian Federation*

\* Correspondence: [tony.novickoff@yandex.ru](mailto:tony.novickoff@yandex.ru)

#### TABLE OF CONTENTS

|                                                            |    |
|------------------------------------------------------------|----|
| XRD part.....                                              | 2  |
| Hirshfeld surface analysis and DFT colculations part ..... | 19 |
| pXRD part.....                                             | 23 |
| DTA and MALDI-LI mass-spectroscopy part .....              | 25 |
| IR and UV-Vis spectroscopy part .....                      | 29 |
| References: .....                                          | 32 |

## XRD part

**Table S1.** Crystal data and structure refinement for **1-10**.

| Identificat<br>ion code                  | 1                                                                                     | 2                                                                                      | 3                                                                                      | 4                                                                                      | 5                                                                                     | 6                                                                                      | 7                                                                                      | 8                                                                                      | 9                                                                                      | 10                                                                                     |
|------------------------------------------|---------------------------------------------------------------------------------------|----------------------------------------------------------------------------------------|----------------------------------------------------------------------------------------|----------------------------------------------------------------------------------------|---------------------------------------------------------------------------------------|----------------------------------------------------------------------------------------|----------------------------------------------------------------------------------------|----------------------------------------------------------------------------------------|----------------------------------------------------------------------------------------|----------------------------------------------------------------------------------------|
| CCDC<br>number                           | <b>23020<br/>25</b>                                                                   | <b>23020<br/>26</b>                                                                    | <b>23020<br/>27</b>                                                                    | <b>23020<br/>28</b>                                                                    | <b>23020<br/>29</b>                                                                   | <b>23020<br/>30</b>                                                                    | <b>23020<br/>31</b>                                                                    | <b>23020<br/>32</b>                                                                    | <b>23020<br/>33</b>                                                                    | <b>23020<br/>34</b>                                                                    |
| Chemical<br>formula                      | <b>Tc(V)<br/>OCl<sub>2</sub>(<br/>Pyrz)<br/><sub>2</sub>OMe</b>                       | <b>Tc(V)<br/>OCl<sub>2</sub>(<br/>Pyrz)<br/><sub>2</sub>OEt</b>                        | <b>Tc(V)<br/>OCl<sub>2</sub>(<br/>Pyrz)<br/><sub>2</sub>On-<br/>Pr</b>                 | <b>Tc(V)<br/>OCl<sub>2</sub>(<br/>Pyrz)<br/><sub>2</sub>On-<br/>Bu</b>                 | <b>Tc(V)<br/>OCl<sub>2</sub>(<br/>Pyrz)<br/><sub>2</sub>OPe<br/>nt</b>                | <b>Tc(V)<br/>OCl<sub>2</sub>(<br/>Pyrz)<br/><sub>2</sub>OHe<br/>x</b>                  | <b>Tc(V)<br/>OCl<sub>2</sub>(<br/>Pyrz)<br/><sub>2</sub>OHe<br/>pt</b>                 | <b>Tc(V)<br/>OCl<sub>2</sub>(<br/>Pyrz)<br/><sub>2</sub>OOC<br/>t</b>                  | <b>Tc(V)<br/>OCl<sub>2</sub>(<br/>Pyrz)<br/><sub>2</sub>ONo<br/>n</b>                  | <b>Tc(V)<br/>OCl<sub>2</sub>(<br/>Pyrz)<br/><sub>2</sub>ODe<br/>c</b>                  |
| Empirical<br>formula                     | C <sub>9</sub> H <sub>11</sub><br>Cl <sub>2</sub> N <sub>4</sub><br>O <sub>2</sub> Tc | C <sub>10</sub> H <sub>11</sub><br>Cl <sub>2</sub> N <sub>4</sub><br>O <sub>2</sub> Tc | C <sub>22</sub> H <sub>30</sub><br>Cl <sub>4</sub> N <sub>8</sub><br>O <sub>4</sub> Tc | C <sub>24</sub> H <sub>34</sub><br>Cl <sub>4</sub> N <sub>8</sub><br>O <sub>4</sub> Tc | C <sub>13</sub> H <sub>9</sub><br>Cl <sub>2</sub> N <sub>4</sub><br>O <sub>2</sub> Tc | C <sub>14</sub> H <sub>11</sub><br>Cl <sub>2</sub> N <sub>4</sub><br>O <sub>2</sub> Tc | C <sub>15</sub> H <sub>13</sub><br>Cl <sub>2</sub> N <sub>4</sub><br>O <sub>2</sub> Tc | C <sub>16</sub> H <sub>15</sub><br>Cl <sub>2</sub> N <sub>4</sub><br>O <sub>2</sub> Tc | C <sub>34</sub> H <sub>48</sub><br>Cl <sub>4</sub> N <sub>8</sub><br>O <sub>4</sub> Tc | C <sub>18</sub> H <sub>12</sub><br>Cl <sub>2</sub> N <sub>4</sub><br>O <sub>2</sub> Tc |
| Formula<br>weight                        | 376.1<br>2                                                                            | 390.1<br>4                                                                             | 808.3<br>4                                                                             | 836.3<br>9                                                                             | 432.2<br>2                                                                            | 446.2<br>5                                                                             | 460.2<br>7                                                                             | 474.3<br>0                                                                             | 976.6<br>5                                                                             | 502.3<br>5                                                                             |
| Crystal<br>system                        | mono<br>clinic                                                                        | mono<br>clinic                                                                         | mono<br>clinic                                                                         | triclin<br>ic                                                                          | mono<br>clinic                                                                        | triclin<br>ic                                                                          | mono<br>clinic                                                                         | triclin<br>ic                                                                          | triclin<br>ic                                                                          | triclin<br>ic                                                                          |
| Space<br>group                           | P2 <sub>1</sub> /c                                                                    | P2 <sub>1</sub> /n                                                                     | P2 <sub>1</sub> /n                                                                     | P-1                                                                                    | P2 <sub>1</sub> /n                                                                    | P-1                                                                                    | P2 <sub>1</sub> /c                                                                     | P-1                                                                                    | P-1                                                                                    | P-1                                                                                    |
| a/Å                                      | 7.007<br>3(8)                                                                         | 11.66<br>29(6)                                                                         | 8.060<br>5(6)                                                                          | 9.064<br>7(11)                                                                         | 14.07<br>97(10<br>)                                                                   | 9.039<br>9(5)                                                                          | 14.08<br>9(2)                                                                          | 6.865<br>1(6)                                                                          | 9.612(<br>4)                                                                           | 6.876<br>6(4)                                                                          |
| b/Å                                      | 11.88<br>47(12<br>)                                                                   | 9.067<br>4(5)                                                                          | 33.63<br>0(3)                                                                          | 12.81<br>36(15<br>)                                                                    | 8.821<br>8(6)                                                                         | 14.14<br>50(8)                                                                         | 9.106<br>9(15)                                                                         | 7.628<br>6(7)                                                                          | 10.48<br>2(4)                                                                          | 7.635<br>9(5)                                                                          |
| c/Å                                      | 15.99<br>67(17<br>)                                                                   | 14.04<br>43(7)                                                                         | 12.07<br>96(9)                                                                         | 14.41<br>34(17<br>)                                                                    | 14.51<br>89(9)                                                                        | 14.98<br>60(8)                                                                         | 16.00<br>9(3)                                                                          | 19.78<br>46(18<br>)                                                                    | 21.51<br>7(8)                                                                          | 21.63<br>50(13<br>)                                                                    |
| α/°                                      | 90                                                                                    | 90                                                                                     | 90                                                                                     | 74.52<br>1(5)                                                                          | 90                                                                                    | 69.99<br>3(2)                                                                          | 90                                                                                     | 86.03<br>1(3)                                                                          | 101.1<br>41(17<br>)                                                                    | 92.22<br>3(2)                                                                          |
| β/°                                      | 101.9<br>50(4)                                                                        | 105.1<br>97(2)                                                                         | 108.8<br>57(3)                                                                         | 82.59<br>8(6)                                                                          | 109.0<br>72(2)                                                                        | 84.12<br>9(2)                                                                          | 113.1<br>49(6)                                                                         | 89.71<br>9(4)                                                                          | 99.63<br>8(16)                                                                         | 94.49<br>3(2)                                                                          |
| γ/°                                      | 90                                                                                    | 90                                                                                     | 90                                                                                     | 83.05<br>7(5)                                                                          | 90                                                                                    | 83.81<br>5(2)                                                                          | 90                                                                                     | 72.28<br>8(4)                                                                          | 90.66<br>5(16)                                                                         | 107.6<br>72(2)                                                                         |
| Volume/Å <sup>3</sup>                    | 1303.<br>3(2)                                                                         | 1433.<br>28(13<br>)                                                                    | 3098.<br>7(4)                                                                          | 1593.<br>4(3)                                                                          | 1704.<br>4(2)                                                                         | 1785.<br>73(17<br>)                                                                    | 1888.<br>7(5)                                                                          | 984.5<br>2(16)                                                                         | 2094.<br>9(14)                                                                         | 1076.<br>75(11<br>)                                                                    |
| Z                                        | 4                                                                                     | 4                                                                                      | 4                                                                                      | 2                                                                                      | 4                                                                                     | 4                                                                                      | 4                                                                                      | 2                                                                                      | 2                                                                                      | 2                                                                                      |
| ρ <sub>calc</sub> /cm <sup>3</sup>       | 1.917                                                                                 | 1.808                                                                                  | 1.733                                                                                  | 1.743                                                                                  | 1.684                                                                                 | 1.660                                                                                  | 1.619                                                                                  | 1.600                                                                                  | 1.548                                                                                  | 1.549                                                                                  |
| μ/mm <sup>-1</sup>                       | 1.513                                                                                 | 1.379                                                                                  | 1.279                                                                                  | 1.247                                                                                  | 1.169                                                                                 | 1.119                                                                                  | 1.060                                                                                  | 1.020                                                                                  | 0.961                                                                                  | 0.937                                                                                  |
| F(000)                                   | 744.0                                                                                 | 776.0                                                                                  | 1616.<br>0                                                                             | 840.0                                                                                  | 872.0                                                                                 | 904.0                                                                                  | 936.0                                                                                  | 484.0                                                                                  | 1000.<br>0                                                                             | 516.0                                                                                  |
| Crystal<br>size/mm <sup>3</sup>          | 0.23 ×<br>0.2 ×<br>0.12                                                               | 0.24 ×<br>0.2 ×<br>0.17                                                                | 0.15 ×<br>0.13 ×<br>0.12                                                               | 0.12 ×<br>0.09 ×<br>0.07                                                               | 0.3 ×<br>0.18 ×<br>0.09                                                               | 0.4 ×<br>0.2 ×<br>0.13                                                                 | 0.1 ×<br>0.03 ×<br>0.02                                                                | 0.21 ×<br>0.1 ×<br>0.03                                                                | 0.13 ×<br>0.12 ×<br>0.02                                                               | 0.2 ×<br>0.18 ×<br>0.03                                                                |
| 2θ range<br>for data<br>collection/<br>° | 8.532<br>to 60                                                                        | 8.384<br>to<br>59.99<br>4                                                              | 8.172<br>to<br>59.99<br>6                                                              | 8.282<br>to<br>59.99<br>6                                                              | 8.39<br>to<br>59.99<br>6                                                              | 8.204<br>to<br>54.99<br>8                                                              | 8.62<br>to<br>54.99<br>6                                                               | 8.262<br>to<br>59.99<br>4                                                              | 8.266<br>to 50                                                                         | 8.246<br>to<br>59.99<br>8                                                              |
| Index<br>ranges                          | -9 ≤ h<br>≤ 9, -                                                                      | -16 ≤<br>h ≤                                                                           | -11 ≤<br>h ≤                                                                           | -12 ≤<br>h ≤                                                                           | -19 ≤<br>h ≤                                                                          | -11 ≤<br>h ≤                                                                           | -18 ≤<br>h ≤                                                                           | -8 ≤ h<br>≤ 9, -                                                                       | -11 ≤<br>h ≤                                                                           | -9 ≤ h<br>≤ 9, -                                                                       |

|                                             |                                                                                   |                                                                                   |                                                                                   |                                                                                   |                                                                                   |                                                                                   |                                                                                   |                                                                                   |                                                                                   |                                                                          |
|---------------------------------------------|-----------------------------------------------------------------------------------|-----------------------------------------------------------------------------------|-----------------------------------------------------------------------------------|-----------------------------------------------------------------------------------|-----------------------------------------------------------------------------------|-----------------------------------------------------------------------------------|-----------------------------------------------------------------------------------|-----------------------------------------------------------------------------------|-----------------------------------------------------------------------------------|--------------------------------------------------------------------------|
|                                             | 16 ≤ k<br>≤ 14,<br>-22 ≤<br>1 ≤ 22                                                | 16, -<br>12 ≤ k<br>≤ 12,<br>-19 ≤<br>1 ≤ 19                                       | 11, -<br>47 ≤ k<br>≤ 47,<br>-16 ≤<br>1 ≤ 16                                       | 12, -<br>18 ≤ k<br>≤ 18,<br>-20 ≤<br>1 ≤ 20                                       | 19, -<br>12 ≤ k<br>≤ 12,<br>-20 ≤<br>1 ≤ 20                                       | 11, -<br>18 ≤ k<br>≤ 18,<br>-19 ≤<br>1 ≤ 19                                       | 18, -<br>11 ≤ k<br>≤ 11,<br>-20 ≤<br>1 ≤ 20                                       | 10 ≤ k<br>≤ 10,<br>-27 ≤<br>1 ≤ 27                                                | 11, -<br>12 ≤ k<br>≤ 11,<br>-25 ≤<br>1 ≤ 25                                       | 10 ≤ k<br>≤ 10,<br>0 ≤ 1<br>≤ 30                                         |
| Reflections collected                       | 23680                                                                             | 21488                                                                             | 54400                                                                             | 28315                                                                             | 28302                                                                             | 24202                                                                             | 23971                                                                             | 17271                                                                             | 24079                                                                             | 6253                                                                     |
| Independent reflections                     | 3791<br>[R <sub>int</sub> =<br>0.075<br>1,<br>R <sub>sigma</sub> =<br>0.058<br>1] | 4174<br>[R <sub>int</sub> =<br>0.033<br>9,<br>R <sub>sigma</sub> =<br>0.027<br>8] | 9011<br>[R <sub>int</sub> =<br>0.079<br>7,<br>R <sub>sigma</sub> =<br>0.063<br>6] | 9273<br>[R <sub>int</sub> =<br>0.122<br>0,<br>R <sub>sigma</sub> =<br>0.163<br>1] | 4961<br>[R <sub>int</sub> =<br>0.066<br>2,<br>R <sub>sigma</sub> =<br>0.052<br>6] | 8008<br>[R <sub>int</sub> =<br>0.055<br>9,<br>R <sub>sigma</sub> =<br>0.065<br>9] | 4324<br>[R <sub>int</sub> =<br>0.200<br>9,<br>R <sub>sigma</sub> =<br>0.164<br>9] | 5723<br>[R <sub>int</sub> =<br>0.070<br>4,<br>R <sub>sigma</sub> =<br>0.092<br>9] | 7336<br>[R <sub>int</sub> =<br>0.336<br>0,<br>R <sub>sigma</sub> =<br>0.412<br>1] | 6253<br>[R <sub>int</sub> =<br>?,<br>R <sub>sigma</sub> =<br>0.054<br>0] |
| Data/restraints/parameters                  | 3791/<br>0/164                                                                    | 4174/<br>1/214                                                                    | 9011/<br>0/363                                                                    | 9273/<br>0/381                                                                    | 4961/<br>0/200                                                                    | 8008/<br>6/417                                                                    | 4324/<br>0/217                                                                    | 5723/<br>0/227                                                                    | 7336/<br>276/4<br>69                                                              | 6253/<br>0/358                                                           |
| Goodness-of-fit on F <sup>2</sup>           | 1.029                                                                             | 1.022                                                                             | 1.017                                                                             | 0.949                                                                             | 1.006                                                                             | 1.037                                                                             | 0.965                                                                             | 0.984                                                                             | 0.935                                                                             | 1.033                                                                    |
| Final R indexes [I ≥ 2σ (I)]                | R <sub>1</sub> =<br>0.036<br>3,<br>wR <sub>2</sub> =<br>0.071<br>2                | R <sub>1</sub> =<br>0.022<br>8,<br>wR <sub>2</sub> =<br>0.045<br>6                | R <sub>1</sub> =<br>0.046<br>1,<br>wR <sub>2</sub> =<br>0.083<br>3                | R <sub>1</sub> =<br>0.063<br>3,<br>wR <sub>2</sub> =<br>0.101<br>5                | R <sub>1</sub> =<br>0.032<br>1,<br>wR <sub>2</sub> =<br>0.056<br>1                | R <sub>1</sub> =<br>0.040<br>7,<br>wR <sub>2</sub> =<br>0.081<br>4                | R <sub>1</sub> =<br>0.061<br>4,<br>wR <sub>2</sub> =<br>0.111<br>1                | R <sub>1</sub> =<br>0.046<br>6,<br>wR <sub>2</sub> =<br>0.079<br>9                | R <sub>1</sub> =<br>0.092<br>5,<br>wR <sub>2</sub> =<br>0.158<br>6                | R <sub>1</sub> =<br>0.034<br>6,<br>wR <sub>2</sub> =<br>0.060<br>8       |
| Final R indexes [all data]                  | R <sub>1</sub> =<br>0.059<br>1,<br>wR <sub>2</sub> =<br>0.078<br>4                | R <sub>1</sub> =<br>0.031<br>0,<br>wR <sub>2</sub> =<br>0.048<br>8                | R <sub>1</sub> =<br>0.078<br>7,<br>wR <sub>2</sub> =<br>0.095<br>6                | R <sub>1</sub> =<br>0.120<br>7,<br>wR <sub>2</sub> =<br>0.123<br>8                | R <sub>1</sub> =<br>0.053<br>9,<br>wR <sub>2</sub> =<br>0.062<br>8                | R <sub>1</sub> =<br>0.057<br>2,<br>wR <sub>2</sub> =<br>0.088<br>6                | R <sub>1</sub> =<br>0.165<br>8,<br>wR <sub>2</sub> =<br>0.147<br>8                | R <sub>1</sub> =<br>0.074<br>8,<br>wR <sub>2</sub> =<br>0.088<br>6                | R <sub>1</sub> =<br>0.291<br>2,<br>wR <sub>2</sub> =<br>0.235<br>2                | R <sub>1</sub> =<br>0.049<br>6,<br>wR <sub>2</sub> =<br>0.065<br>4       |
| Largest diff. peak/hole / e Å <sup>-3</sup> | 0.64/-<br>0.86                                                                    | 0.47/-<br>0.37                                                                    | 0.61/-<br>0.91                                                                    | 0.92/-<br>1.04                                                                    | 0.48/-<br>0.68                                                                    | 2.81/-<br>2.13                                                                    | 0.73/-<br>1.32                                                                    | 0.74/-<br>0.86                                                                    | 0.86/-<br>1.27                                                                    | 0.67/-<br>0.49                                                           |

**Table S2.** Bond Lengths for **1**.

| Atom | Atom | Length/Å  | Atom | Atom | Length/Å |
|------|------|-----------|------|------|----------|
| Tc1  | Cl2  | 2.3843(8) | N2   | C3   | 1.337(4) |
| Tc1  | Cl1  | 2.4258(8) | N3   | C5   | 1.345(4) |
| Tc1  | O2   | 1.675(2)  | N3   | C8   | 1.338(4) |
| Tc1  | O1   | 1.857(2)  | N4   | C6   | 1.328(4) |
| Tc1  | N1   | 2.134(2)  | N4   | C7   | 1.340(4) |
| Tc1  | N3   | 2.160(2)  | C1   | C2   | 1.385(4) |
| O1   | C9   | 1.407(4)  | C3   | C4   | 1.379(4) |
| N1   | C1   | 1.342(4)  | C5   | C6   | 1.396(4) |
| N1   | C4   | 1.342(4)  | C7   | C8   | 1.385(4) |
| N2   | C2   | 1.327(4)  |      |      |          |

**Table S3.** Bond Angles for **1**.

| Atom | Atom | Atom | Angle/° | Atom | Atom | Atom | Angle/° |
|------|------|------|---------|------|------|------|---------|
|------|------|------|---------|------|------|------|---------|

|     |     |     |            |    |    |     |            |
|-----|-----|-----|------------|----|----|-----|------------|
| C12 | Tc1 | C11 | 176.06(3)  | C1 | N1 | Tc1 | 121.8(2)   |
| O2  | Tc1 | C12 | 94.17(8)   | C4 | N1 | Tc1 | 120.50(19) |
| O2  | Tc1 | C11 | 89.52(8)   | C4 | N1 | C1  | 117.6(3)   |
| O2  | Tc1 | O1  | 174.15(10) | C2 | N2 | C3  | 115.5(3)   |
| O2  | Tc1 | N1  | 92.61(10)  | C5 | N3 | Tc1 | 120.3(2)   |
| O2  | Tc1 | N3  | 91.64(10)  | C8 | N3 | Tc1 | 121.63(19) |
| O1  | Tc1 | C12 | 91.42(7)   | C8 | N3 | C5  | 117.7(3)   |
| O1  | Tc1 | C11 | 84.94(7)   | C6 | N4 | C7  | 115.9(3)   |
| O1  | Tc1 | N1  | 89.29(9)   | N1 | C1 | C2  | 120.5(3)   |
| O1  | Tc1 | N3  | 86.67(9)   | N2 | C2 | C1  | 122.9(3)   |
| N1  | Tc1 | C12 | 87.96(7)   | N2 | C3 | C4  | 123.4(3)   |
| N1  | Tc1 | C11 | 90.49(7)   | N1 | C4 | C3  | 120.1(3)   |
| N1  | Tc1 | N3  | 175.31(10) | N3 | C5 | C6  | 119.9(3)   |
| N3  | Tc1 | C12 | 89.74(7)   | N4 | C6 | C5  | 123.0(3)   |
| N3  | Tc1 | C11 | 91.54(7)   | N4 | C7 | C8  | 122.5(3)   |
| C9  | O1  | Tc1 | 154.5(2)   | N3 | C8 | C7  | 120.8(3)   |

**Table S4.** Hydrogen Bonds for **1**.

| D  | H  | A               | d(D-H)/Å | d(H-A)/Å | d(D-A)/Å | D-H-A/° |
|----|----|-----------------|----------|----------|----------|---------|
| C4 | H4 | N4 <sup>1</sup> | 0.93     | 2.50     | 3.351(4) | 152.8   |

<sup>1</sup>+X,1/2-Y,1/2+Z

**Table S5.** Torsion Angles for **1**.

| A   | B   | C  | D  | Angle/°   | A  | B  | C  | D  | Angle/° |
|-----|-----|----|----|-----------|----|----|----|----|---------|
| Tc1 | N1  | C1 | C2 | -175.8(2) | N3 | C5 | C6 | N4 | -0.4(5) |
| Tc1 | N1  | C4 | C3 | 176.2(2)  | N4 | C7 | C8 | N3 | 1.0(5)  |
| Tc1 | N3  | C5 | C6 | -170.7(2) | C1 | N1 | C4 | C3 | -0.6(5) |
| Tc1 | N3  | C8 | C7 | 170.3(2)  | C2 | N2 | C3 | C4 | 1.2(5)  |
| C12 | Tc1 | O1 | C9 | 164.9(5)  | C3 | N2 | C2 | C1 | -0.8(5) |
| C11 | Tc1 | O1 | C9 | -16.6(5)  | C4 | N1 | C1 | C2 | 1.0(4)  |
| N1  | Tc1 | O1 | C9 | -107.1(5) | C5 | N3 | C8 | C7 | -2.7(4) |
| N1  | C1  | C2 | N2 | -0.3(5)   | C6 | N4 | C7 | C8 | 1.0(5)  |
| N2  | C3  | C4 | N1 | -0.5(5)   | C7 | N4 | C6 | C5 | -1.3(5) |
| N3  | Tc1 | O1 | C9 | 75.3(5)   | C8 | N3 | C5 | C6 | 2.4(4)  |

**Table S6.** Bond Lengths for **2**.

| Atom | Atom | Length/Å   | Atom | Atom | Length/Å |
|------|------|------------|------|------|----------|
| Tc1  | C11  | 2.4429(4)  | N4   | C6   | 1.335(2) |
| Tc1  | C12  | 2.3695(4)  | N4   | C7   | 1.333(2) |
| Tc1  | O1   | 1.8643(12) | N3   | C5   | 1.344(2) |
| Tc1  | O2   | 1.6687(12) | N3   | C8   | 1.338(2) |
| Tc1  | N1   | 2.1275(13) | C3   | C4   | 1.384(2) |
| Tc1  | N3   | 2.1474(14) | C2   | C1   | 1.389(2) |
| O1   | C9   | 1.421(2)   | C6   | C5   | 1.385(2) |
| N2   | C3   | 1.340(2)   | C7   | C8   | 1.389(2) |
| N2   | C2   | 1.333(2)   | C9   | C10  | 1.458(5) |
| N1   | C1   | 1.340(2)   | C9   | C10A | 1.496(8) |

|    |    |          |  |  |  |
|----|----|----------|--|--|--|
| N1 | C4 | 1.349(2) |  |  |  |
|----|----|----------|--|--|--|

**Table S7.** Bond Angles for **2**.

| Atom | Atom | Atom | Angle/°     | Atom | Atom | Atom | Angle/°    |
|------|------|------|-------------|------|------|------|------------|
| Cl2  | Tc1  | Cl1  | 174.958(16) | C1   | N1   | Tc1  | 120.18(11) |
| O1   | Tc1  | Cl1  | 84.59(4)    | C1   | N1   | C4   | 117.88(14) |
| O1   | Tc1  | Cl2  | 90.69(4)    | C4   | N1   | Tc1  | 121.87(11) |
| O1   | Tc1  | N1   | 90.38(5)    | C7   | N4   | C6   | 115.70(16) |
| O1   | Tc1  | N3   | 87.32(5)    | C5   | N3   | Tc1  | 120.77(11) |
| O2   | Tc1  | Cl1  | 87.30(5)    | C8   | N3   | Tc1  | 121.86(11) |
| O2   | Tc1  | Cl2  | 97.51(5)    | C8   | N3   | C5   | 117.29(15) |
| O2   | Tc1  | O1   | 171.28(6)   | N2   | C3   | C4   | 122.85(16) |
| O2   | Tc1  | N1   | 92.54(5)    | N2   | C2   | C1   | 122.41(16) |
| O2   | Tc1  | N3   | 89.88(6)    | N1   | C1   | C2   | 120.63(16) |
| N1   | Tc1  | Cl1  | 88.10(4)    | N4   | C6   | C5   | 122.57(17) |
| N1   | Tc1  | Cl2  | 90.15(4)    | N4   | C7   | C8   | 123.04(17) |
| N1   | Tc1  | N3   | 177.49(5)   | N1   | C4   | C3   | 120.01(15) |
| N3   | Tc1  | Cl1  | 92.69(4)    | N3   | C5   | C6   | 120.93(16) |
| N3   | Tc1  | Cl2  | 88.87(4)    | N3   | C8   | C7   | 120.47(16) |
| C9   | O1   | Tc1  | 146.52(12)  | O1   | C9   | C10  | 110.8(3)   |
| C2   | N2   | C3   | 116.17(15)  | O1   | C9   | C10A | 111.3(4)   |

**Table S8.** Hydrogen Bonds for **2**.

| D  | H  | A               | d(D-H)/Å | d(H-A)/Å | d(D-A)/Å | D-H-A/°   |
|----|----|-----------------|----------|----------|----------|-----------|
| C3 | H3 | O2 <sup>1</sup> | 0.90(2)  | 2.55(2)  | 3.160(2) | 125.8(16) |
| C1 | H1 | N4 <sup>2</sup> | 0.88(2)  | 2.59(2)  | 3.362(2) | 147.0(16) |
| C8 | H8 | N2 <sup>3</sup> | 0.94(2)  | 2.43(2)  | 3.312(2) | 156.6(16) |

<sup>1</sup>1/2-X,1/2+Y,3/2-Z; <sup>2</sup>1/2+X,1/2-Y,1/2+Z; <sup>3</sup>-1/2+X,3/2-Y,-1/2+Z

**Table S9.** Torsion Angles for **2**.

| A   | B   | C  | D    | Angle/°     | A  | B   | C  | D  | Angle/° |
|-----|-----|----|------|-------------|----|-----|----|----|---------|
| Tc1 | O1  | C9 | C10  | 101.4(6)    | N4 | C6  | C5 | N3 | -0.5(3) |
| Tc1 | O1  | C9 | C10A | 135.7(13)   | N4 | C7  | C8 | N3 | -0.5(3) |
| Tc1 | N1  | C1 | C2   | 174.84(12)  | N3 | Tc1 | O1 | C9 | 82.2(2) |
| Tc1 | N1  | C4 | C3   | -175.48(12) | C3 | N2  | C2 | C1 | 1.3(3)  |
| Tc1 | N3  | C5 | C6   | 176.47(15)  | C2 | N2  | C3 | C4 | -2.0(3) |
| Tc1 | N3  | C8 | C7   | -175.94(14) | C1 | N1  | C4 | C3 | 1.3(2)  |
| Cl1 | Tc1 | O1 | C9   | -10.7(2)    | C6 | N4  | C7 | C8 | -0.2(3) |
| Cl2 | Tc1 | O1 | C9   | 171.1(2)    | C7 | N4  | C6 | C5 | 0.7(3)  |
| N2  | C3  | C4 | N1   | 0.8(3)      | C4 | N1  | C1 | C2 | -2.0(2) |
| N2  | C2  | C1 | N1   | 0.7(3)      | C5 | N3  | C8 | C7 | 0.7(3)  |
| N1  | Tc1 | O1 | C9   | -98.8(2)    | C8 | N3  | C5 | C6 | -0.2(3) |

**Table S10.** Bond Lengths for **3**.

| Atom | Atom | Length/Å  | Atom | Atom | Length/Å |
|------|------|-----------|------|------|----------|
| Tc1  | Cl1  | 2.4382(8) | N23  | C28  | 1.337(4) |

|     |      |           |     |     |          |
|-----|------|-----------|-----|-----|----------|
| Tc1 | Cl2  | 2.3869(8) | N4  | C6  | 1.339(5) |
| Tc1 | O1   | 1.842(3)  | N4  | C7  | 1.335(5) |
| Tc1 | O2   | 1.676(3)  | N2  | C2  | 1.333(5) |
| Tc1 | N3   | 2.145(3)  | N2  | C3  | 1.334(5) |
| Tc1 | N1   | 2.144(3)  | N22 | C22 | 1.337(5) |
| Tc2 | Cl21 | 2.4443(8) | N22 | C23 | 1.333(5) |
| Tc2 | Cl22 | 2.3815(8) | N24 | C26 | 1.338(5) |
| Tc2 | O22  | 1.678(3)  | N24 | C27 | 1.331(5) |
| Tc2 | O21  | 1.850(3)  | C2  | C1  | 1.387(5) |
| Tc2 | N21  | 2.145(3)  | C3  | C4  | 1.380(5) |
| Tc2 | N23  | 2.143(3)  | C8  | C7  | 1.363(5) |
| O1  | C9   | 1.424(4)  | C6  | C5  | 1.386(5) |
| O21 | C29  | 1.419(4)  | C21 | C22 | 1.388(5) |
| N21 | C21  | 1.341(4)  | C26 | C25 | 1.380(5) |
| N21 | C24  | 1.342(4)  | C23 | C24 | 1.386(5) |
| N3  | C8   | 1.341(4)  | C30 | C29 | 1.510(5) |
| N3  | C5   | 1.346(4)  | C30 | C31 | 1.517(5) |
| N1  | C1   | 1.344(4)  | C11 | C10 | 1.522(5) |
| N1  | C4   | 1.342(4)  | C10 | C9  | 1.506(5) |
| N23 | C25  | 1.343(4)  | C28 | C27 | 1.391(5) |

**Table S11.** Bond Angles for **3**.

| Atom | Atom | Atom | Angle/°    | Atom | Atom | Atom | Angle/°  |
|------|------|------|------------|------|------|------|----------|
| Cl2  | Tc1  | Cl1  | 177.15(4)  | C24  | N21  | Tc2  | 121.7(2) |
| O1   | Tc1  | Cl1  | 85.68(7)   | C8   | N3   | Tc1  | 121.5(2) |
| O1   | Tc1  | Cl2  | 91.54(7)   | C8   | N3   | C5   | 117.4(3) |
| O1   | Tc1  | N3   | 88.81(10)  | C5   | N3   | Tc1  | 121.1(2) |
| O1   | Tc1  | N1   | 88.55(10)  | C1   | N1   | Tc1  | 121.3(2) |
| O2   | Tc1  | Cl1  | 87.28(7)   | C4   | N1   | Tc1  | 121.2(2) |
| O2   | Tc1  | Cl2  | 95.50(7)   | C4   | N1   | C1   | 117.4(3) |
| O2   | Tc1  | O1   | 172.94(10) | C25  | N23  | Tc2  | 121.3(2) |
| O2   | Tc1  | N3   | 91.67(11)  | C28  | N23  | Tc2  | 121.4(2) |
| O2   | Tc1  | N1   | 90.75(11)  | C28  | N23  | C25  | 117.3(3) |
| N3   | Tc1  | Cl1  | 89.77(7)   | C7   | N4   | C6   | 115.5(3) |
| N3   | Tc1  | Cl2  | 90.77(7)   | C2   | N2   | C3   | 115.3(3) |
| N1   | Tc1  | Cl1  | 88.47(7)   | C23  | N22  | C22  | 115.4(3) |
| N1   | Tc1  | Cl2  | 90.86(7)   | C27  | N24  | C26  | 115.6(3) |
| N1   | Tc1  | N3   | 176.93(12) | N2   | C2   | C1   | 123.4(3) |
| Cl22 | Tc2  | Cl21 | 177.17(4)  | N1   | C1   | C2   | 120.1(3) |
| O22  | Tc2  | Cl21 | 86.69(7)   | N2   | C3   | C4   | 123.0(3) |
| O22  | Tc2  | Cl22 | 96.04(8)   | N3   | C8   | C7   | 121.0(3) |
| O22  | Tc2  | O21  | 171.55(9)  | N4   | C6   | C5   | 122.7(3) |
| O22  | Tc2  | N21  | 91.69(11)  | N21  | C21  | C22  | 120.8(3) |
| O22  | Tc2  | N23  | 90.70(11)  | N4   | C7   | C8   | 123.2(3) |
| O21  | Tc2  | Cl21 | 84.96(7)   | N22  | C22  | C21  | 122.6(3) |
| O21  | Tc2  | Cl22 | 92.29(7)   | N3   | C5   | C6   | 120.1(3) |
| O21  | Tc2  | N21  | 89.62(10)  | N24  | C26  | C25  | 123.0(3) |
| O21  | Tc2  | N23  | 87.87(10)  | N23  | C25  | C26  | 120.6(3) |
| N21  | Tc2  | Cl21 | 90.21(7)   | N22  | C23  | C24  | 123.5(3) |

|     |     |      |            |     |     |     |          |
|-----|-----|------|------------|-----|-----|-----|----------|
| N21 | Tc2 | Cl22 | 90.46(7)   | C29 | C30 | C31 | 109.3(3) |
| N23 | Tc2 | Cl21 | 88.91(7)   | N1  | C4  | C3  | 120.8(3) |
| N23 | Tc2 | Cl22 | 90.30(7)   | N21 | C24 | C23 | 120.2(3) |
| N23 | Tc2 | N21  | 177.40(12) | C9  | C10 | C11 | 109.5(3) |
| C9  | O1  | Tc1  | 155.5(2)   | N23 | C28 | C27 | 120.8(3) |
| C29 | O21 | Tc2  | 150.6(2)   | O1  | C9  | C10 | 112.1(3) |
| C21 | N21 | Tc2  | 120.8(2)   | N24 | C27 | C28 | 122.7(4) |
| C21 | N21 | C24  | 117.5(3)   | O21 | C29 | C30 | 112.2(3) |

**Table S12.** Hydrogen Bonds for **3**.

| D   | H   | A                | d(D-H)/Å | d(H-A)/Å | d(D-A)/Å | D-H-A/° |
|-----|-----|------------------|----------|----------|----------|---------|
| C5  | H5  | O22 <sup>1</sup> | 0.95     | 2.37     | 3.246(4) | 153.9   |
| C25 | H25 | O2               | 0.95     | 2.43     | 3.248(4) | 143.8   |
| C4  | H4  | O22              | 0.95     | 2.42     | 3.238(4) | 144.0   |
| C24 | H24 | O2 <sup>2</sup>  | 0.95     | 2.36     | 3.253(4) | 155.8   |

<sup>1</sup>1+X,+Y,+Z; <sup>2</sup>-1+X,+Y,+Z

**Table S13.** Torsion Angles for **3**.

| A    | B   | C   | D   | Angle/°   | A   | B   | C   | D   | Angle/°   |
|------|-----|-----|-----|-----------|-----|-----|-----|-----|-----------|
| Tc1  | O1  | C9  | C10 | 168.9(3)  | N2  | C2  | C1  | N1  | 0.0(6)    |
| Tc1  | N3  | C8  | C7  | -179.0(3) | N2  | C3  | C4  | N1  | -0.2(6)   |
| Tc1  | N3  | C5  | C6  | 178.2(3)  | N22 | C23 | C24 | N21 | -0.9(6)   |
| Tc1  | N1  | C1  | C2  | 176.3(2)  | N24 | C26 | C25 | N23 | 0.2(6)    |
| Tc1  | N1  | C4  | C3  | -176.3(3) | C2  | N2  | C3  | C4  | 0.3(5)    |
| Tc2  | O21 | C29 | C30 | -166.7(3) | C1  | N1  | C4  | C3  | 0.0(5)    |
| Tc2  | N21 | C21 | C22 | -179.2(3) | C3  | N2  | C2  | C1  | -0.2(5)   |
| Tc2  | N21 | C24 | C23 | 179.7(3)  | C8  | N3  | C5  | C6  | -0.3(5)   |
| Tc2  | N23 | C25 | C26 | 178.1(3)  | C6  | N4  | C7  | C8  | 0.8(6)    |
| Tc2  | N23 | C28 | C27 | -178.3(3) | C21 | N21 | C24 | C23 | 0.7(5)    |
| Cl21 | Tc2 | O21 | C29 | -4.7(4)   | C7  | N4  | C6  | C5  | -1.6(6)   |
| Cl1  | Tc1 | O1  | C9  | 1.4(5)    | C22 | N22 | C23 | C24 | 0.5(5)    |
| Cl2  | Tc1 | O1  | C9  | -178.0(5) | C5  | N3  | C8  | C7  | -0.5(5)   |
| Cl22 | Tc2 | O21 | C29 | 174.6(4)  | C26 | N24 | C27 | C28 | 0.4(6)    |
| N21  | Tc2 | O21 | C29 | -94.9(4)  | C25 | N23 | C28 | C27 | -0.5(5)   |
| N21  | C21 | C22 | N22 | -0.3(6)   | C23 | N22 | C22 | C21 | 0.1(5)    |
| N3   | Tc1 | O1  | C9  | 91.2(5)   | C4  | N1  | C1  | C2  | 0.1(5)    |
| N3   | C8  | C7  | N4  | 0.3(6)    | C24 | N21 | C21 | C22 | -0.1(5)   |
| N1   | Tc1 | O1  | C9  | -87.2(5)  | C11 | C10 | C9  | O1  | 177.0(3)  |
| N23  | Tc2 | O21 | C29 | 84.4(4)   | C28 | N23 | C25 | C26 | 0.4(5)    |
| N23  | C28 | C27 | N24 | 0.2(6)    | C27 | N24 | C26 | C25 | -0.5(6)   |
| N4   | C6  | C5  | N3  | 1.4(6)    | C31 | C30 | C29 | O21 | -174.3(3) |

**Table S14.** Bond Lengths for **4**.

| Atom | Atom | Length/Å   | Atom | Atom | Length/Å |
|------|------|------------|------|------|----------|
| Tc1  | Cl1  | 2.4335(13) | N2   | C2   | 1.336(7) |
| Tc1  | Cl2  | 2.3748(13) | N2   | C3   | 1.332(7) |
| Tc1  | O1   | 1.857(3)   | N22  | C22  | 1.335(7) |

|     |      |            |     |     |          |
|-----|------|------------|-----|-----|----------|
| Tc1 | O2   | 1.667(4)   | N22 | C23 | 1.353(6) |
| Tc1 | N3   | 2.126(4)   | N23 | C28 | 1.324(6) |
| Tc1 | N1   | 2.148(4)   | N23 | C25 | 1.363(6) |
| Tc2 | Cl21 | 2.4420(14) | N1  | C4  | 1.335(7) |
| Tc2 | Cl22 | 2.3721(14) | N1  | C1  | 1.343(6) |
| Tc2 | O21  | 1.861(3)   | C6  | C5  | 1.390(7) |
| Tc2 | O22  | 1.677(3)   | C11 | C10 | 1.524(7) |
| Tc2 | N21  | 2.146(4)   | C11 | C12 | 1.524(7) |
| Tc2 | N23  | 2.127(4)   | C8  | C7  | 1.387(7) |
| O1  | C9   | 1.425(5)   | C22 | C21 | 1.380(7) |
| O21 | C29  | 1.422(6)   | C23 | C24 | 1.386(7) |
| N4  | C6   | 1.332(7)   | C27 | C28 | 1.393(7) |
| N4  | C7   | 1.336(7)   | C26 | C25 | 1.385(7) |
| N24 | C27  | 1.336(6)   | C9  | C10 | 1.517(7) |
| N24 | C26  | 1.341(7)   | C31 | C32 | 1.541(7) |
| N3  | C8   | 1.347(6)   | C31 | C30 | 1.522(8) |
| N3  | C5   | 1.350(6)   | C2  | C1  | 1.372(7) |
| N21 | C24  | 1.336(6)   | C4  | C3  | 1.387(7) |
| N21 | C21  | 1.353(6)   | C30 | C29 | 1.525(7) |

**Table S15.** Bond Angles for **4**.

| Atom | Atom | Atom | Angle/°    | Atom | Atom | Atom | Angle/°  |
|------|------|------|------------|------|------|------|----------|
| Cl2  | Tc1  | Cl1  | 175.57(5)  | C8   | N3   | C5   | 118.0(4) |
| O1   | Tc1  | Cl1  | 84.49(11)  | C5   | N3   | Tc1  | 120.0(4) |
| O1   | Tc1  | Cl2  | 91.35(11)  | C24  | N21  | Tc2  | 120.6(3) |
| O1   | Tc1  | N3   | 90.14(16)  | C24  | N21  | C21  | 117.1(5) |
| O1   | Tc1  | N1   | 88.05(16)  | C21  | N21  | Tc2  | 122.3(4) |
| O2   | Tc1  | Cl1  | 88.11(12)  | C3   | N2   | C2   | 115.2(5) |
| O2   | Tc1  | Cl2  | 96.09(12)  | C22  | N22  | C23  | 115.6(5) |
| O2   | Tc1  | O1   | 172.47(16) | C28  | N23  | Tc2  | 121.1(3) |
| O2   | Tc1  | N3   | 91.00(17)  | C28  | N23  | C25  | 117.5(4) |
| O2   | Tc1  | N1   | 90.66(17)  | C25  | N23  | Tc2  | 121.4(3) |
| N3   | Tc1  | Cl1  | 88.08(11)  | C4   | N1   | Tc1  | 120.9(4) |
| N3   | Tc1  | Cl2  | 90.43(11)  | C4   | N1   | C1   | 116.5(5) |
| N3   | Tc1  | N1   | 177.91(15) | C1   | N1   | Tc1  | 122.6(4) |
| N1   | Tc1  | Cl1  | 90.70(12)  | N4   | C6   | C5   | 123.1(5) |
| N1   | Tc1  | Cl2  | 90.67(12)  | C10  | C11  | C12  | 114.0(4) |
| Cl22 | Tc2  | Cl21 | 175.74(5)  | N3   | C8   | C7   | 120.2(5) |
| O21  | Tc2  | Cl21 | 84.64(12)  | N4   | C7   | C8   | 122.9(5) |
| O21  | Tc2  | Cl22 | 91.11(12)  | N22  | C22  | C21  | 122.9(5) |
| O21  | Tc2  | N21  | 87.42(15)  | N22  | C23  | C24  | 122.3(5) |
| O21  | Tc2  | N23  | 91.19(15)  | N24  | C27  | C28  | 122.1(5) |
| O22  | Tc2  | Cl21 | 87.50(13)  | N21  | C24  | C23  | 121.1(5) |
| O22  | Tc2  | Cl22 | 96.74(13)  | N24  | C26  | C25  | 123.3(5) |
| O22  | Tc2  | O21  | 171.13(17) | N3   | C5   | C6   | 119.8(5) |
| O22  | Tc2  | N21  | 88.59(16)  | O1   | C9   | C10  | 110.5(4) |
| O22  | Tc2  | N23  | 92.92(16)  | C30  | C31  | C32  | 112.5(5) |
| N21  | Tc2  | Cl21 | 90.70(12)  | N2   | C2   | C1   | 122.5(5) |
| N21  | Tc2  | Cl22 | 88.97(12)  | N1   | C4   | C3   | 120.7(5) |



|     |     |      |            |     |     |     |          |
|-----|-----|------|------------|-----|-----|-----|----------|
| N23 | Tc2 | Cl21 | 90.19(12)  | C9  | C10 | C11 | 113.1(4) |
| N23 | Tc2 | Cl22 | 90.04(12)  | N21 | C21 | C22 | 120.9(5) |
| N23 | Tc2 | N21  | 178.28(16) | N2  | C3  | C4  | 123.3(6) |
| C9  | O1  | Tc1  | 146.6(3)   | N23 | C28 | C27 | 121.6(5) |
| C29 | O21 | Tc2  | 147.0(3)   | N23 | C25 | C26 | 119.7(5) |
| C6  | N4  | C7   | 115.9(5)   | C31 | C30 | C29 | 114.7(4) |
| C27 | N24 | C26  | 115.7(4)   | N1  | C1  | C2  | 121.8(5) |
| C8  | N3  | Tc1  | 122.0(4)   | O21 | C29 | C30 | 110.9(4) |

**Table S16.** Hydrogen Bonds for **4**.

| D   | H   | A                | d(D-H)/Å | d(H-A)/Å | d(D-A)/Å | D-H-A/° |
|-----|-----|------------------|----------|----------|----------|---------|
| C6  | H6  | O22 <sup>1</sup> | 0.95     | 2.69     | 3.301(7) | 122.8   |
| C24 | H24 | N4 <sup>2</sup>  | 0.95     | 2.43     | 3.292(7) | 150.2   |
| C26 | H26 | O2               | 0.95     | 2.54     | 3.144(7) | 121.7   |
| C4  | H4  | N24 <sup>3</sup> | 0.95     | 2.60     | 3.355(7) | 137.2   |
| C28 | H28 | N2 <sup>4</sup>  | 0.95     | 2.50     | 3.344(7) | 147.3   |

<sup>1</sup>1+X,+Y,+Z; <sup>2</sup>1-X,-Y,1-Z; <sup>3</sup>1-X,1-Y,-Z; <sup>4</sup>2-X,1-Y,-Z

**Table S17.** Torsion Angles for **4**.

| A    | B   | C   | D   | Angle/°   | A   | B   | C   | D   | Angle/°   |
|------|-----|-----|-----|-----------|-----|-----|-----|-----|-----------|
| Tc1  | O1  | C9  | C10 | -106.1(6) | N22 | C23 | C24 | N21 | 2.0(8)    |
| Tc1  | N3  | C8  | C7  | -175.1(3) | N23 | Tc2 | O21 | C29 | 116.6(6)  |
| Tc1  | N3  | C5  | C6  | 176.1(3)  | N1  | Tc1 | O1  | C9  | -87.2(6)  |
| Tc1  | N1  | C4  | C3  | 178.4(4)  | N1  | C4  | C3  | N2  | -0.1(8)   |
| Tc1  | N1  | C1  | C2  | -178.1(4) | C6  | N4  | C7  | C8  | 0.3(7)    |
| Tc2  | O21 | C29 | C30 | 168.9(4)  | C8  | N3  | C5  | C6  | -1.2(7)   |
| Tc2  | N21 | C24 | C23 | 174.5(4)  | C7  | N4  | C6  | C5  | 0.7(7)    |
| Tc2  | N21 | C21 | C22 | -175.7(4) | C22 | N22 | C23 | C24 | 1.1(8)    |
| Tc2  | N23 | C28 | C27 | -175.6(4) | C23 | N22 | C22 | C21 | -2.4(8)   |
| Tc2  | N23 | C25 | C26 | 176.6(4)  | C27 | N24 | C26 | C25 | 3.0(8)    |
| Cl1  | Tc1 | O1  | C9  | 3.7(6)    | C24 | N21 | C21 | C22 | 2.5(8)    |
| Cl21 | Tc2 | O21 | C29 | 26.6(6)   | C26 | N24 | C27 | C28 | -1.9(7)   |
| Cl2  | Tc1 | O1  | C9  | -177.8(6) | C5  | N3  | C8  | C7  | 2.2(7)    |
| Cl22 | Tc2 | O21 | C29 | -153.3(6) | C31 | C30 | C29 | O21 | 72.5(6)   |
| O1   | C9  | C10 | C11 | -70.0(6)  | C2  | N2  | C3  | C4  | 0.3(8)    |
| N4   | C6  | C5  | N3  | -0.2(8)   | C4  | N1  | C1  | C2  | 0.8(8)    |
| N24  | C27 | C28 | N23 | -0.5(8)   | C32 | C31 | C30 | C29 | -173.2(5) |
| N24  | C26 | C25 | N23 | -1.7(8)   | C21 | N21 | C24 | C23 | -3.7(7)   |
| N3   | Tc1 | O1  | C9  | 91.8(6)   | C3  | N2  | C2  | C1  | 0.0(8)    |
| N3   | C8  | C7  | N4  | -1.8(8)   | C12 | C11 | C10 | C9  | 170.9(4)  |
| N21  | Tc2 | O21 | C29 | -64.4(6)  | C28 | N23 | C25 | C26 | -0.9(7)   |
| N2   | C2  | C1  | N1  | -0.6(9)   | C25 | N23 | C28 | C27 | 1.9(7)    |
| N22  | C22 | C21 | N21 | 0.6(9)    | C1  | N1  | C4  | C3  | -0.5(7)   |

**Table S18.** Bond Lengths for **5**.

| Atom | Atom | Length/Å  | Atom | Atom | Length/Å |
|------|------|-----------|------|------|----------|
| Tc1  | Cl1  | 2.4321(6) | N1   | C1   | 1.347(3) |

|     |     |            |     |     |          |
|-----|-----|------------|-----|-----|----------|
| Tc1 | C12 | 2.3746(6)  | N2  | C3  | 1.333(3) |
| Tc1 | O1  | 1.8562(15) | N2  | C2  | 1.338(3) |
| Tc1 | O2  | 1.6737(16) | C7  | C8  | 1.388(3) |
| Tc1 | N3  | 2.1268(18) | C3  | C4  | 1.383(3) |
| Tc1 | N1  | 2.1416(18) | C2  | C1  | 1.385(3) |
| O1  | C9  | 1.421(3)   | C6  | C5  | 1.381(3) |
| N3  | C8  | 1.339(3)   | C10 | C11 | 1.532(3) |
| N3  | C5  | 1.352(3)   | C10 | C9  | 1.518(3) |
| N4  | C7  | 1.337(3)   | C11 | C12 | 1.517(3) |
| N4  | C6  | 1.338(3)   | C13 | C12 | 1.522(3) |
| N1  | C4  | 1.342(3)   |     |     |          |

**Table S19.** Bond Angles for **5**.

| Atom | Atom | Atom | Angle/°    | Atom | Atom | Atom | Angle/°    |
|------|------|------|------------|------|------|------|------------|
| C12  | Tc1  | C11  | 174.93(2)  | C5   | N3   | Tc1  | 121.51(14) |
| O1   | Tc1  | C11  | 84.75(5)   | C7   | N4   | C6   | 115.90(19) |
| O1   | Tc1  | C12  | 90.27(5)   | C4   | N1   | Tc1  | 121.33(15) |
| O1   | Tc1  | N3   | 89.98(7)   | C4   | N1   | C1   | 116.82(19) |
| O1   | Tc1  | N1   | 87.55(7)   | C1   | N1   | Tc1  | 121.84(15) |
| O2   | Tc1  | C11  | 88.34(6)   | C3   | N2   | C2   | 116.0(2)   |
| O2   | Tc1  | C12  | 96.67(6)   | N4   | C7   | C8   | 122.3(2)   |
| O2   | Tc1  | O1   | 172.74(7)  | N2   | C3   | C4   | 122.7(2)   |
| O2   | Tc1  | N3   | 92.21(7)   | N2   | C2   | C1   | 122.4(2)   |
| O2   | Tc1  | N1   | 90.11(7)   | N4   | C6   | C5   | 123.0(2)   |
| N3   | Tc1  | C11  | 89.55(5)   | N1   | C4   | C3   | 121.1(2)   |
| N3   | Tc1  | C12  | 89.51(5)   | N3   | C8   | C7   | 121.1(2)   |
| N3   | Tc1  | N1   | 177.28(7)  | N1   | C1   | C2   | 121.0(2)   |
| N1   | Tc1  | C11  | 89.08(5)   | C9   | C10  | C11  | 114.1(2)   |
| N1   | Tc1  | C12  | 91.65(5)   | C12  | C11  | C10  | 113.8(2)   |
| C9   | O1   | Tc1  | 151.24(14) | N3   | C5   | C6   | 120.4(2)   |
| C8   | N3   | Tc1  | 121.26(15) | C11  | C12  | C13  | 113.8(2)   |
| C8   | N3   | C5   | 117.20(19) | O1   | C9   | C10  | 109.89(19) |

**Table S20.** Hydrogen Bonds for **5**.

| D  | H  | A               | d(D-H)/Å | d(H-A)/Å | d(D-A)/Å | D-H-A/° |
|----|----|-----------------|----------|----------|----------|---------|
| C6 | H6 | O2 <sup>1</sup> | 0.95     | 2.66     | 3.287(3) | 123.8   |
| C4 | H4 | N4 <sup>2</sup> | 0.95     | 2.50     | 3.314(3) | 143.3   |
| C8 | H8 | N2 <sup>3</sup> | 0.95     | 2.53     | 3.302(3) | 138.6   |
| C5 | H5 | O2 <sup>1</sup> | 0.95     | 2.70     | 3.292(3) | 121.4   |

<sup>1</sup>1/2-X,1/2+Y,3/2-Z; <sup>2</sup>1/2+X,3/2-Y,1/2+Z; <sup>3</sup>-1/2+X,1/2-Y,-1/2+Z

**Table S21.** Torsion Angles for **5**.

| A   | B  | C  | D   | Angle/°     | A  | B  | C  | D  | Angle/° |
|-----|----|----|-----|-------------|----|----|----|----|---------|
| Tc1 | O1 | C9 | C10 | -175.4(2)   | N2 | C2 | C1 | N1 | 1.0(4)  |
| Tc1 | N3 | C8 | C7  | -176.98(17) | C7 | N4 | C6 | C5 | 1.4(4)  |
| Tc1 | N3 | C5 | C6  | 178.09(17)  | C3 | N2 | C2 | C1 | 0.2(4)  |
| Tc1 | N1 | C4 | C3  | -178.94(17) | C2 | N2 | C3 | C4 | -1.1(4) |

|     |     |    |    |            |     |     |     |     |          |
|-----|-----|----|----|------------|-----|-----|-----|-----|----------|
| Tc1 | N1  | C1 | C2 | 178.05(17) | C6  | N4  | C7  | C8  | -0.2(4)  |
| C11 | Tc1 | O1 | C9 | 8.2(3)     | C4  | N1  | C1  | C2  | -1.2(3)  |
| C12 | Tc1 | O1 | C9 | -172.8(3)  | C8  | N3  | C5  | C6  | 0.0(3)   |
| N3  | Tc1 | O1 | C9 | 97.7(3)    | C1  | N1  | C4  | C3  | 0.3(3)   |
| N4  | C7  | C8 | N3 | -1.0(4)    | C10 | C11 | C12 | C13 | 174.8(2) |
| N4  | C6  | C5 | N3 | -1.4(4)    | C11 | C10 | C9  | O1  | -65.0(3) |
| N1  | Tc1 | O1 | C9 | -81.1(3)   | C5  | N3  | C8  | C7  | 1.1(3)   |
| N2  | C3  | C4 | N1 | 0.9(4)     | C9  | C10 | C11 | C12 | -72.6(3) |

**Table S22.** Bond Lengths for **6**.

| Atom | Atom | Length/Å  | Atom | Atom | Length/Å |
|------|------|-----------|------|------|----------|
| Tc1  | C11  | 2.4418(9) | N24  | C26  | 1.340(5) |
| Tc1  | C12  | 2.3718(9) | N24  | C27  | 1.340(5) |
| Tc1  | O1   | 1.872(2)  | N23  | C28  | 1.344(4) |
| Tc1  | O2   | 1.676(3)  | N23  | C25  | 1.350(4) |
| Tc1  | N1   | 2.145(3)  | N4   | C6   | 1.336(5) |
| Tc1  | N3   | 2.138(3)  | N4   | C7   | 1.338(5) |
| Tc2  | C122 | 2.3819(8) | C12  | C13  | 1.525(5) |
| Tc2  | C121 | 2.4327(9) | C12  | C11  | 1.523(5) |
| Tc2  | O21  | 1.858(2)  | C24  | C23  | 1.381(5) |
| Tc2  | O22  | 1.670(2)  | C13  | C14  | 1.517(5) |
| Tc2  | N21  | 2.117(3)  | C11  | C10  | 1.533(5) |
| Tc2  | N23  | 2.155(3)  | C22  | C21  | 1.379(5) |
| O21  | C29  | 1.420(4)  | C4   | C3   | 1.391(5) |
| O1   | C9   | 1.426(4)  | C26  | C25  | 1.378(5) |
| N21  | C24  | 1.354(4)  | C2   | C1   | 1.386(5) |
| N21  | C21  | 1.342(4)  | C5   | C6   | 1.391(5) |
| N1   | C4   | 1.346(4)  | C28  | C27  | 1.374(5) |
| N1   | C1   | 1.348(4)  | C34  | C33  | 1.474(6) |
| N22  | C22  | 1.339(4)  | C10  | C9   | 1.509(5) |
| N22  | C23  | 1.347(5)  | C7   | C8   | 1.388(5) |
| N3   | C5   | 1.350(4)  | C30  | C29  | 1.505(6) |
| N3   | C8   | 1.342(5)  | C30  | C31  | 1.493(7) |
| N2   | C2   | 1.338(5)  | C31  | C32  | 1.564(8) |
| N2   | C3   | 1.343(5)  | C32  | C33  | 1.309(9) |

**Table S23.** Bond Angles for **6**.

| Atom | Atom | Atom | Angle/°    | Atom | Atom | Atom | Angle/°  |
|------|------|------|------------|------|------|------|----------|
| C12  | Tc1  | C11  | 175.85(3)  | C1   | N1   | Tc1  | 120.7(2) |
| O1   | Tc1  | C11  | 84.05(8)   | C22  | N22  | C23  | 115.7(3) |
| O1   | Tc1  | C12  | 91.80(8)   | C5   | N3   | Tc1  | 120.7(2) |
| O1   | Tc1  | N1   | 86.21(10)  | C8   | N3   | Tc1  | 122.2(2) |
| O1   | Tc1  | N3   | 91.89(10)  | C8   | N3   | C5   | 117.1(3) |
| O2   | Tc1  | C11  | 87.19(9)   | C2   | N2   | C3   | 115.8(3) |
| O2   | Tc1  | C12  | 96.94(9)   | C26  | N24  | C27  | 115.3(3) |
| O2   | Tc1  | O1   | 169.96(11) | C28  | N23  | Tc2  | 122.4(2) |
| O2   | Tc1  | N1   | 88.84(11)  | C28  | N23  | C25  | 116.6(3) |
| O2   | Tc1  | N3   | 93.08(11)  | C25  | N23  | Tc2  | 121.0(2) |

|      |     |      |            |     |     |     |          |
|------|-----|------|------------|-----|-----|-----|----------|
| N1   | Tc1 | C11  | 89.61(8)   | C6  | N4  | C7  | 116.0(3) |
| N1   | Tc1 | C12  | 90.08(8)   | C11 | C12 | C13 | 114.6(3) |
| N3   | Tc1 | C11  | 90.44(8)   | N21 | C24 | C23 | 120.8(3) |
| N3   | Tc1 | C12  | 89.73(8)   | C14 | C13 | C12 | 112.2(3) |
| N3   | Tc1 | N1   | 178.08(12) | C12 | C11 | C10 | 112.3(3) |
| C122 | Tc2 | C121 | 175.07(3)  | N22 | C22 | C21 | 122.8(3) |
| O21  | Tc2 | C122 | 90.20(7)   | N22 | C23 | C24 | 122.4(3) |
| O21  | Tc2 | C121 | 85.15(7)   | N21 | C21 | C22 | 121.0(3) |
| O21  | Tc2 | N21  | 91.61(11)  | N1  | C4  | C3  | 120.7(3) |
| O21  | Tc2 | N23  | 85.99(11)  | N24 | C26 | C25 | 123.1(3) |
| O22  | Tc2 | C122 | 96.04(9)   | N2  | C2  | C1  | 123.0(4) |
| O22  | Tc2 | C121 | 88.76(9)   | N2  | C3  | C4  | 122.5(4) |
| O22  | Tc2 | O21  | 171.56(11) | N3  | C5  | C6  | 120.4(4) |
| O22  | Tc2 | N21  | 94.07(12)  | N23 | C28 | C27 | 121.5(3) |
| O22  | Tc2 | N23  | 88.20(12)  | N4  | C6  | C5  | 123.0(4) |
| N21  | Tc2 | C122 | 89.96(7)   | N1  | C1  | C2  | 120.4(3) |
| N21  | Tc2 | C121 | 88.53(8)   | N24 | C27 | C28 | 122.7(3) |
| N21  | Tc2 | N23  | 177.36(11) | N23 | C25 | C26 | 120.8(3) |
| N23  | Tc2 | C122 | 91.14(8)   | C9  | C10 | C11 | 114.8(3) |
| N23  | Tc2 | C121 | 90.17(8)   | N4  | C7  | C8  | 122.2(4) |
| C29  | O21 | Tc2  | 148.4(2)   | N3  | C8  | C7  | 121.4(4) |
| C9   | O1  | Tc1  | 140.9(2)   | C31 | C30 | C29 | 114.3(4) |
| C24  | N21 | Tc2  | 121.1(2)   | O1  | C9  | C10 | 113.2(3) |
| C21  | N21 | Tc2  | 121.7(2)   | O21 | C29 | C30 | 111.6(3) |
| C21  | N21 | C24  | 117.1(3)   | C30 | C31 | C32 | 108.3(5) |
| C4   | N1  | Tc1  | 121.7(2)   | C33 | C32 | C31 | 120.6(6) |
| C4   | N1  | C1   | 117.5(3)   | C32 | C33 | C34 | 125.2(5) |

**Table S24.** Hydrogen Bonds for **6**.

| D   | H   | A                | d(D-H)/Å | d(H-A)/Å | d(D-A)/Å | D-H-A/° |
|-----|-----|------------------|----------|----------|----------|---------|
| C24 | H24 | O2 <sup>1</sup>  | 0.95     | 2.63     | 3.235(4) | 122.3   |
| C23 | H23 | O2 <sup>1</sup>  | 0.95     | 2.64     | 3.252(4) | 122.3   |
| C3  | H3  | O22              | 0.95     | 2.62     | 3.238(5) | 123.5   |
| C5  | H5  | N22 <sup>2</sup> | 0.95     | 2.48     | 3.297(5) | 143.9   |
| C1  | H1  | N24 <sup>3</sup> | 0.95     | 2.59     | 3.369(5) | 139.7   |
| C25 | H25 | N2 <sup>4</sup>  | 0.95     | 2.54     | 3.347(4) | 142.9   |

<sup>1</sup>-1+X,+Y,+Z; <sup>2</sup>1-X,1-Y,-Z; <sup>3</sup>2-X,-Y,1-Z; <sup>4</sup>1-X,-Y,1-Z

**Table S25.** Torsion Angles for **6**.

| A   | B   | C   | D   | Angle/°   | A   | B   | C   | D   | Angle/°   |
|-----|-----|-----|-----|-----------|-----|-----|-----|-----|-----------|
| Tc1 | O1  | C9  | C10 | 176.9(2)  | N4  | C7  | C8  | N3  | -1.1(6)   |
| Tc1 | N1  | C4  | C3  | -177.7(3) | C12 | C11 | C10 | C9  | -167.2(3) |
| Tc1 | N1  | C1  | C2  | 177.7(3)  | C24 | N21 | C21 | C22 | -2.0(5)   |
| Tc1 | N3  | C5  | C6  | -176.9(3) | C13 | C12 | C11 | C10 | 178.7(3)  |
| Tc1 | N3  | C8  | C7  | 177.7(3)  | C11 | C12 | C13 | C14 | -173.5(3) |
| Tc2 | O21 | C29 | C30 | 161.1(3)  | C11 | C10 | C9  | O1  | -62.1(4)  |
| Tc2 | N21 | C24 | C23 | -176.0(3) | C22 | N22 | C23 | C24 | -2.7(5)   |

|      |     |     |     |           |     |     |     |     |           |
|------|-----|-----|-----|-----------|-----|-----|-----|-----|-----------|
| Tc2  | N21 | C21 | C22 | 174.6(3)  | C23 | N22 | C22 | C21 | 1.3(5)    |
| Tc2  | N23 | C28 | C27 | 178.7(3)  | C21 | N21 | C24 | C23 | 0.6(5)    |
| Tc2  | N23 | C25 | C26 | -178.2(3) | C4  | N1  | C1  | C2  | -0.7(5)   |
| Cl1  | Tc1 | O1  | C9  | 26.0(3)   | C26 | N24 | C27 | C28 | 1.3(6)    |
| Cl2  | Tc1 | O1  | C9  | -154.0(3) | C2  | N2  | C3  | C4  | -1.1(5)   |
| Cl22 | Tc2 | O21 | C29 | 146.6(5)  | C3  | N2  | C2  | C1  | 1.1(5)    |
| Cl21 | Tc2 | O21 | C29 | -35.1(5)  | C5  | N3  | C8  | C7  | -0.1(5)   |
| N21  | Tc2 | O21 | C29 | -123.5(5) | C28 | N23 | C25 | C26 | 0.4(5)    |
| N21  | C24 | C23 | N22 | 1.8(6)    | C6  | N4  | C7  | C8  | 1.3(6)    |
| O2   | Tc1 | O1  | C9  | -3.4(8)   | C1  | N1  | C4  | C3  | 0.6(5)    |
| N1   | Tc1 | O1  | C9  | -64.0(3)  | C27 | N24 | C26 | C25 | -0.7(6)   |
| N1   | C4  | C3  | N2  | 0.3(6)    | C25 | N23 | C28 | C27 | 0.1(5)    |
| N22  | C22 | C21 | N21 | 1.1(6)    | C7  | N4  | C6  | C5  | -0.5(6)   |
| N3   | Tc1 | O1  | C9  | 116.2(3)  | C8  | N3  | C5  | C6  | 0.9(5)    |
| N3   | C5  | C6  | N4  | -0.6(6)   | C30 | C31 | C32 | C33 | -159.6(8) |
| N2   | C2  | C1  | N1  | -0.2(6)   | C29 | C30 | C31 | C32 | 174.9(5)  |
| N24  | C26 | C25 | N23 | -0.1(6)   | C31 | C30 | C29 | O21 | -70.3(5)  |
| N23  | Tc2 | O21 | C29 | 55.4(5)   | C31 | C32 | C33 | C34 | -175.3(6) |
| N23  | C28 | C27 | N24 | -1.0(6)   |     |     |     |     |           |

**Table S26.** Bond Lengths for **7**.

| Atom | Atom | Length/Å | Atom | Atom | Length/Å  |
|------|------|----------|------|------|-----------|
| Tc1  | Cl1  | 2.442(2) | N2   | C2   | 1.345(10) |
| Tc1  | Cl2  | 2.367(2) | N2   | C3   | 1.326(9)  |
| Tc1  | O1   | 1.867(5) | C11  | C10  | 1.519(10) |
| Tc1  | O2   | 1.667(5) | C11  | C12  | 1.548(10) |
| Tc1  | N1   | 2.146(6) | C8   | C7   | 1.384(9)  |
| Tc1  | N3   | 2.121(6) | C10  | C9   | 1.526(10) |
| O1   | C9   | 1.411(8) | C12  | C13  | 1.515(10) |
| N1   | C4   | 1.362(9) | C4   | C3   | 1.385(10) |
| N1   | C1   | 1.341(8) | C13  | C14  | 1.521(10) |
| N3   | C8   | 1.349(8) | C6   | C5   | 1.361(10) |
| N3   | C5   | 1.340(9) | C1   | C2   | 1.401(10) |
| N4   | C7   | 1.334(9) | C14  | C15  | 1.522(10) |
| N4   | C6   | 1.341(9) |      |      |           |

**Table S27.** Bond Angles for **7**.

| Atom | Atom | Atom | Angle/°   | Atom | Atom | Atom | Angle/°  |
|------|------|------|-----------|------|------|------|----------|
| Cl2  | Tc1  | Cl1  | 175.15(7) | C8   | N3   | Tc1  | 119.7(5) |
| O1   | Tc1  | Cl1  | 84.28(16) | C5   | N3   | Tc1  | 122.9(5) |
| O1   | Tc1  | Cl2  | 90.90(16) | C5   | N3   | C8   | 117.3(6) |
| O1   | Tc1  | N1   | 86.4(2)   | C7   | N4   | C6   | 116.1(7) |
| O1   | Tc1  | N3   | 91.3(2)   | C3   | N2   | C2   | 115.5(7) |
| O2   | Tc1  | Cl1  | 87.66(18) | C10  | C11  | C12  | 111.7(6) |
| O2   | Tc1  | Cl2  | 97.18(18) | N3   | C8   | C7   | 120.3(7) |
| O2   | Tc1  | O1   | 170.7(2)  | C11  | C10  | C9   | 114.4(6) |
| O2   | Tc1  | N1   | 88.9(2)   | C13  | C12  | C11  | 113.7(6) |
| O2   | Tc1  | N3   | 93.2(2)   | N1   | C4   | C3   | 120.3(7) |

|    |     |     |           |     |     |     |          |
|----|-----|-----|-----------|-----|-----|-----|----------|
| N1 | Tc1 | C11 | 90.13(17) | C12 | C13 | C14 | 112.2(6) |
| N1 | Tc1 | C12 | 90.08(17) | O1  | C9  | C10 | 112.8(6) |
| N3 | Tc1 | C11 | 88.63(16) | N4  | C7  | C8  | 122.3(7) |
| N3 | Tc1 | C12 | 90.97(17) | N4  | C6  | C5  | 122.8(7) |
| N3 | Tc1 | N1  | 177.5(2)  | N1  | C1  | C2  | 121.7(7) |
| C9 | O1  | Tc1 | 142.7(4)  | N3  | C5  | C6  | 121.1(7) |
| C4 | N1  | Tc1 | 121.0(5)  | N2  | C2  | C1  | 121.9(7) |
| C1 | N1  | Tc1 | 122.5(5)  | N2  | C3  | C4  | 124.1(7) |
| C1 | N1  | C4  | 116.4(6)  | C13 | C14 | C15 | 114.2(7) |

**Table S28.** Hydrogen Bonds for 7.

| D  | H  | A               | d(D-H)/Å | d(H-A)/Å | d(D-A)/Å | D-H-A/° |
|----|----|-----------------|----------|----------|----------|---------|
| C6 | H6 | O2 <sup>1</sup> | 0.95     | 2.49     | 3.172(9) | 129.1   |

<sup>1</sup>2-X,-1/2+Y,3/2-Z

**Table S29.** Torsion Angles for 7.

| A   | B   | C  | D   | Angle/°   | A   | B   | C   | D   | Angle/°   |
|-----|-----|----|-----|-----------|-----|-----|-----|-----|-----------|
| Tc1 | O1  | C9 | C10 | 171.1(5)  | C11 | C10 | C9  | O1  | 81.0(9)   |
| Tc1 | N1  | C4 | C3  | 178.5(5)  | C11 | C12 | C13 | C14 | -179.9(7) |
| Tc1 | N1  | C1 | C2  | -178.0(5) | C8  | N3  | C5  | C6  | -2.7(11)  |
| Tc1 | N3  | C8 | C7  | -176.0(5) | C10 | C11 | C12 | C13 | -167.3(7) |
| Tc1 | N3  | C5 | C6  | 177.2(6)  | C12 | C11 | C10 | C9  | -176.7(7) |
| C11 | Tc1 | O1 | C9  | 27.9(8)   | C12 | C13 | C14 | C15 | -172.0(7) |
| C12 | Tc1 | O1 | C9  | -152.6(8) | C4  | N1  | C1  | C2  | 0.9(11)   |
| N1  | Tc1 | O1 | C9  | -62.6(8)  | C7  | N4  | C6  | C5  | 2.5(12)   |
| N1  | C4  | C3 | N2  | 0.9(13)   | C6  | N4  | C7  | C8  | -1.1(11)  |
| N1  | C1  | C2 | N2  | -2.0(12)  | C1  | N1  | C4  | C3  | -0.3(11)  |
| N3  | Tc1 | O1 | C9  | 116.4(8)  | C5  | N3  | C8  | C7  | 3.9(11)   |
| N3  | C8  | C7 | N4  | -2.1(12)  | C2  | N2  | C3  | C4  | -1.9(12)  |
| N4  | C6  | C5 | N3  | -0.6(12)  | C3  | N2  | C2  | C1  | 2.4(12)   |

**Table S30.** Bond Lengths for 8.

| Atom | Atom | Length/Å  | Atom | Atom | Length/Å |
|------|------|-----------|------|------|----------|
| Tc1  | C12  | 2.3690(9) | N3   | C8   | 1.355(4) |
| Tc1  | C11  | 2.4510(9) | N3   | C5   | 1.347(4) |
| Tc1  | O1   | 1.866(2)  | C15  | C16  | 1.528(4) |
| Tc1  | O2   | 1.674(2)  | C15  | C14  | 1.515(4) |
| Tc1  | N1   | 2.134(2)  | C3   | C4   | 1.386(4) |
| Tc1  | N3   | 2.147(3)  | C9   | C10  | 1.520(4) |
| O1   | C9   | 1.418(3)  | C7   | C8   | 1.383(4) |
| N1   | C4   | 1.340(4)  | C13  | C14  | 1.522(4) |
| N1   | C1   | 1.342(4)  | C13  | C12  | 1.516(4) |
| N2   | C3   | 1.336(4)  | C1   | C2   | 1.382(4) |
| N2   | C2   | 1.339(4)  | C6   | C5   | 1.390(4) |
| N4   | C7   | 1.331(4)  | C11  | C10  | 1.526(4) |
| N4   | C6   | 1.338(4)  | C11  | C12  | 1.525(4) |

**Table S31.** Bond Angles for **8**.

| Atom | Atom | Atom | Angle/°    | Atom | Atom | Atom | Angle/°  |
|------|------|------|------------|------|------|------|----------|
| Cl2  | Tc1  | Cl1  | 175.05(3)  | C7   | N4   | C6   | 115.6(3) |
| O1   | Tc1  | Cl2  | 91.44(7)   | C8   | N3   | Tc1  | 120.8(2) |
| O1   | Tc1  | Cl1  | 83.71(7)   | C5   | N3   | Tc1  | 122.0(2) |
| O1   | Tc1  | N1   | 90.83(9)   | C5   | N3   | C8   | 117.2(3) |
| O1   | Tc1  | N3   | 88.15(9)   | C14  | C15  | C16  | 114.7(3) |
| O2   | Tc1  | Cl2  | 98.29(8)   | N2   | C3   | C4   | 122.4(3) |
| O2   | Tc1  | Cl1  | 86.59(8)   | N1   | C4   | C3   | 121.2(3) |
| O2   | Tc1  | O1   | 170.07(10) | O1   | C9   | C10  | 110.4(3) |
| O2   | Tc1  | N1   | 91.26(10)  | N4   | C7   | C8   | 123.4(3) |
| O2   | Tc1  | N3   | 89.92(10)  | C12  | C13  | C14  | 115.3(3) |
| N1   | Tc1  | Cl2  | 89.05(7)   | N1   | C1   | C2   | 120.5(3) |
| N1   | Tc1  | Cl1  | 90.04(7)   | C15  | C14  | C13  | 112.5(3) |
| N1   | Tc1  | N3   | 178.56(10) | N4   | C6   | C5   | 122.9(3) |
| N3   | Tc1  | Cl2  | 89.97(7)   | C12  | C11  | C10  | 113.2(3) |
| N3   | Tc1  | Cl1  | 90.85(7)   | N2   | C2   | C1   | 123.2(3) |
| C9   | O1   | Tc1  | 148.04(19) | C9   | C10  | C11  | 112.9(3) |
| C4   | N1   | Tc1  | 121.75(19) | C13  | C12  | C11  | 113.8(3) |
| C4   | N1   | C1   | 117.2(3)   | N3   | C8   | C7   | 120.3(3) |
| C1   | N1   | Tc1  | 121.1(2)   | N3   | C5   | C6   | 120.6(3) |
| C3   | N2   | C2   | 115.5(3)   |      |      |      |          |

**Table S32.** Hydrogen Bonds for **8**.

| D  | H  | A               | d(D-H)/Å | d(H-A)/Å | d(D-A)/Å | D-H-A/° |
|----|----|-----------------|----------|----------|----------|---------|
| C3 | H3 | N2 <sup>1</sup> | 0.93     | 2.56     | 3.225(4) | 128.9   |

<sup>1</sup>-X,2-Y,-Z**Table S33.** Torsion Angles for **8**.

| A   | B   | C   | D   | Angle/°   | A   | B   | C   | D   | Angle/°   |
|-----|-----|-----|-----|-----------|-----|-----|-----|-----|-----------|
| Tc1 | O1  | C9  | C10 | 170.7(3)  | C3  | N2  | C2  | C1  | -0.3(5)   |
| Tc1 | N1  | C4  | C3  | 178.8(2)  | C16 | C15 | C14 | C13 | -179.9(3) |
| Tc1 | N1  | C1  | C2  | -179.6(2) | C4  | N1  | C1  | C2  | -0.8(4)   |
| Tc1 | N3  | C8  | C7  | -178.9(2) | C7  | N4  | C6  | C5  | 0.4(5)    |
| Tc1 | N3  | C5  | C6  | 179.3(2)  | C1  | N1  | C4  | C3  | 0.0(4)    |
| Cl2 | Tc1 | O1  | C9  | 174.7(4)  | C14 | C13 | C12 | C11 | -178.8(3) |
| Cl1 | Tc1 | O1  | C9  | -6.3(4)   | C6  | N4  | C7  | C8  | 0.0(5)    |
| O1  | C9  | C10 | C11 | -178.9(3) | C2  | N2  | C3  | C4  | -0.5(5)   |
| N1  | Tc1 | O1  | C9  | -96.2(4)  | C10 | C11 | C12 | C13 | 178.4(3)  |
| N1  | C1  | C2  | N2  | 1.0(5)    | C12 | C13 | C14 | C15 | -179.4(3) |
| N2  | C3  | C4  | N1  | 0.7(5)    | C12 | C11 | C10 | C9  | 179.2(3)  |
| N4  | C7  | C8  | N3  | -1.4(5)   | C8  | N3  | C5  | C6  | -1.8(4)   |
| N4  | C6  | C5  | N3  | 0.5(5)    | C5  | N3  | C8  | C7  | 2.2(5)    |
| N3  | Tc1 | O1  | C9  | 84.8(4)   |     |     |     |     |           |

**Table S34.** Bond Lengths for **9**.

| Atom | Atom | Length/Å  | Atom | Atom | Length/Å  |
|------|------|-----------|------|------|-----------|
| Tc1  | Cl1  | 2.439(4)  | N21  | C24  | 1.36(2)   |
| Tc1  | Cl2  | 2.373(4)  | N22  | C22  | 1.311(19) |
| Tc1  | O2   | 1.668(11) | N22  | C23  | 1.34(2)   |
| Tc1  | O1   | 1.853(12) | C8   | C7   | 1.37(2)   |
| Tc1  | N3   | 2.116(13) | C6   | C5   | 1.37(2)   |
| Tc1  | N1   | 2.128(13) | C4   | C3   | 1.37(2)   |
| Tc2  | Cl21 | 2.451(4)  | C2   | C1   | 1.39(2)   |
| Tc2  | Cl22 | 2.376(4)  | C9   | C10  | 1.46(2)   |
| Tc2  | O22  | 1.658(11) | C10  | C11  | 1.60(2)   |
| Tc2  | O21  | 1.901(11) | C11  | C12  | 1.51(2)   |
| Tc2  | N23  | 2.138(12) | C12  | C13  | 1.56(2)   |
| Tc2  | N21  | 2.127(13) | C13  | C14  | 1.54(2)   |
| O1   | C9   | 1.451(18) | C14  | C15  | 1.56(2)   |
| O21  | C29  | 1.405(18) | C15  | C16  | 1.50(2)   |
| N3   | C8   | 1.37(2)   | C16  | C17  | 1.50(2)   |
| N3   | C5   | 1.36(2)   | C25  | C26  | 1.40(2)   |
| N4   | C7   | 1.32(2)   | C27  | C28  | 1.37(2)   |
| N4   | C6   | 1.351(18) | C21  | C22  | 1.37(2)   |
| N1   | C4   | 1.33(2)   | C23  | C24  | 1.38(2)   |
| N1   | C1   | 1.35(2)   | C29  | C30  | 1.46(2)   |
| N2   | C3   | 1.33(2)   | C30  | C31  | 1.54(2)   |
| N2   | C2   | 1.32(2)   | C31  | C32  | 1.51(2)   |
| N23  | C25  | 1.335(17) | C32  | C33  | 1.51(2)   |
| N23  | C28  | 1.353(19) | C33  | C34  | 1.54(2)   |
| N24  | C26  | 1.352(19) | C34  | C35  | 1.53(2)   |
| N24  | C27  | 1.333(19) | C35  | C36  | 1.52(3)   |
| N21  | C21  | 1.362(18) | C36  | C37  | 1.49(2)   |

**Table S35.** Bond Angles for **9**.

| Atom | Atom | Atom | Angle/°  | Atom | Atom | Atom | Angle/°   |
|------|------|------|----------|------|------|------|-----------|
| Cl2  | Tc1  | Cl1  | 174.6(2) | C25  | N23  | Tc2  | 123.8(10) |
| O2   | Tc1  | Cl1  | 86.9(4)  | C25  | N23  | C28  | 114.9(14) |
| O2   | Tc1  | Cl2  | 98.5(4)  | C28  | N23  | Tc2  | 121.2(11) |
| O2   | Tc1  | O1   | 170.8(5) | C27  | N24  | C26  | 118.8(15) |
| O2   | Tc1  | N3   | 89.5(5)  | C21  | N21  | Tc2  | 121.5(10) |
| O2   | Tc1  | N1   | 92.2(5)  | C24  | N21  | Tc2  | 119.7(11) |
| O1   | Tc1  | Cl1  | 84.7(3)  | C24  | N21  | C21  | 118.8(15) |
| O1   | Tc1  | Cl2  | 90.0(3)  | C22  | N22  | C23  | 111.7(15) |
| O1   | Tc1  | N3   | 87.1(5)  | C7   | C8   | N3   | 120.3(16) |
| O1   | Tc1  | N1   | 91.2(5)  | N4   | C7   | C8   | 125.2(16) |
| N3   | Tc1  | Cl1  | 90.7(3)  | N4   | C6   | C5   | 122.2(15) |
| N3   | Tc1  | Cl2  | 89.8(3)  | N3   | C5   | C6   | 122.7(15) |
| N3   | Tc1  | N1   | 178.3(6) | N1   | C4   | C3   | 123.4(17) |
| N1   | Tc1  | Cl1  | 89.0(3)  | N2   | C3   | C4   | 121.3(17) |
| N1   | Tc1  | Cl2  | 90.3(3)  | N2   | C2   | C1   | 123.3(16) |
| Cl22 | Tc2  | Cl21 | 175.6(2) | N1   | C1   | C2   | 120.2(15) |
| O22  | Tc2  | Cl21 | 86.4(4)  | O1   | C9   | C10  | 112.5(14) |
| O22  | Tc2  | Cl22 | 97.9(4)  | C9   | C10  | C11  | 112.4(15) |



|     |     |      |           |     |     |     |           |
|-----|-----|------|-----------|-----|-----|-----|-----------|
| O22 | Tc2 | O21  | 169.3(5)  | C12 | C11 | C10 | 109.3(16) |
| O22 | Tc2 | N23  | 87.2(5)   | C11 | C12 | C13 | 112.3(16) |
| O22 | Tc2 | N21  | 95.0(5)   | C14 | C13 | C12 | 110.3(15) |
| O21 | Tc2 | C121 | 85.0(3)   | C13 | C14 | C15 | 113.4(15) |
| O21 | Tc2 | C122 | 90.7(3)   | C16 | C15 | C14 | 110.6(16) |
| O21 | Tc2 | N23  | 86.3(5)   | C15 | C16 | C17 | 112.6(19) |
| O21 | Tc2 | N21  | 91.4(5)   | N23 | C25 | C26 | 124.0(15) |
| N23 | Tc2 | C121 | 89.7(4)   | N24 | C26 | C25 | 118.4(15) |
| N23 | Tc2 | C122 | 90.2(4)   | N24 | C27 | C28 | 121.0(16) |
| N21 | Tc2 | C121 | 90.2(4)   | N23 | C28 | C27 | 122.9(16) |
| N21 | Tc2 | C122 | 89.7(4)   | N21 | C21 | C22 | 117.6(15) |
| N21 | Tc2 | N23  | 177.7(6)  | N22 | C22 | C21 | 127.7(16) |
| C9  | O1  | Tc1  | 145.7(10) | N22 | C23 | C24 | 126.8(18) |
| C29 | O21 | Tc2  | 141.4(10) | N21 | C24 | C23 | 117.3(17) |
| C8  | N3  | Tc1  | 121.8(11) | O21 | C29 | C30 | 116.2(14) |
| C5  | N3  | Tc1  | 123.5(11) | C29 | C30 | C31 | 112.4(15) |
| C5  | N3  | C8   | 114.7(15) | C32 | C31 | C30 | 114.4(15) |
| C7  | N4  | C6   | 114.7(15) | C31 | C32 | C33 | 110.3(14) |
| C4  | N1  | Tc1  | 121.8(12) | C32 | C33 | C34 | 114.6(15) |
| C4  | N1  | C1   | 115.7(15) | C35 | C34 | C33 | 112.0(15) |
| C1  | N1  | Tc1  | 122.3(11) | C36 | C35 | C34 | 115.2(17) |
| C2  | N2  | C3   | 116.1(16) | C37 | C36 | C35 | 115.2(18) |

**Table S36.** Hydrogen Bonds for **9**.

| D   | H   | A                | d(D-H)/Å | d(H-A)/Å | d(D-A)/Å | D-H-A/° |
|-----|-----|------------------|----------|----------|----------|---------|
| C7  | H7  | N4 <sup>1</sup>  | 0.95     | 2.62     | 3.31(2)  | 129.5   |
| C27 | H27 | N24 <sup>2</sup> | 0.95     | 2.70     | 3.36(2)  | 127.0   |

<sup>1</sup>2-X,1-Y,-Z; <sup>2</sup>1-X,-Y,2-Z

**Table S37.** Torsion Angles for **9**.

| A   | B   | C   | D   | Angle/°    | A   | B   | C   | D   | Angle/°    |
|-----|-----|-----|-----|------------|-----|-----|-----|-----|------------|
| Tc1 | O1  | C9  | C10 | 99.5(19)   | C6  | N4  | C7  | C8  | -2(3)      |
| Tc1 | N3  | C8  | C7  | 177.6(12)  | C5  | N3  | C8  | C7  | -3(2)      |
| Tc1 | N3  | C5  | C6  | -176.6(12) | C4  | N1  | C1  | C2  | 2(2)       |
| Tc1 | N1  | C4  | C3  | -177.8(13) | C3  | N2  | C2  | C1  | 1(3)       |
| Tc1 | N1  | C1  | C2  | 178.0(12)  | C2  | N2  | C3  | C4  | -1(3)      |
| Tc2 | O21 | C29 | C30 | 97.9(19)   | C1  | N1  | C4  | C3  | -2(3)      |
| Tc2 | N23 | C25 | C26 | -178.6(12) | C9  | C10 | C11 | C12 | 75.0(19)   |
| Tc2 | N23 | C28 | C27 | 178.8(13)  | C10 | C11 | C12 | C13 | 178.7(15)  |
| Tc2 | N21 | C21 | C22 | 179.4(11)  | C11 | C12 | C13 | C14 | 176.7(15)  |
| Tc2 | N21 | C24 | C23 | -177.8(13) | C12 | C13 | C14 | C15 | -175.6(15) |
| C11 | Tc1 | O1  | C9  | -21.2(17)  | C13 | C14 | C15 | C16 | 172.7(15)  |
| C12 | Tc1 | O1  | C9  | 159.5(17)  | C14 | C15 | C16 | C17 | -174.3(16) |
| O1  | C9  | C10 | C11 | -178.8(14) | C25 | N23 | C28 | C27 | 2(2)       |
| O21 | C29 | C30 | C31 | -176.0(15) | C26 | N24 | C27 | C28 | 1(3)       |
| N3  | Tc1 | O1  | C9  | 69.8(18)   | C27 | N24 | C26 | C25 | -1(2)      |
| N3  | C8  | C7  | N4  | 2(3)       | C28 | N23 | C25 | C26 | -2(2)      |

|     |     |     |     |            |     |     |     |     |            |
|-----|-----|-----|-----|------------|-----|-----|-----|-----|------------|
| N4  | C6  | C5  | N3  | -4(3)      | C21 | N21 | C24 | C23 | 0(3)       |
| N1  | Tc1 | O1  | C9  | -110.1(18) | C22 | N22 | C23 | C24 | 0(3)       |
| N1  | C4  | C3  | N2  | 1(3)       | C23 | N22 | C22 | C21 | 2(3)       |
| N2  | C2  | C1  | N1  | -2(3)      | C24 | N21 | C21 | C22 | 1(2)       |
| N23 | C25 | C26 | N24 | 2(3)       | C29 | C30 | C31 | C32 | 179.0(16)  |
| N24 | C27 | C28 | N23 | -2(3)      | C30 | C31 | C32 | C33 | 173.3(16)  |
| N21 | C21 | C22 | N22 | -3(3)      | C31 | C32 | C33 | C34 | -171.6(15) |
| N22 | C23 | C24 | N21 | -1(3)      | C32 | C33 | C34 | C35 | 173.7(15)  |
| C8  | N3  | C5  | C6  | 4(2)       | C33 | C34 | C35 | C36 | 178.4(16)  |
| C7  | N4  | C6  | C5  | 2(2)       | C34 | C35 | C36 | C37 | -71(2)     |

**Table S38.** Bond Lengths for **10**.

| Atom | Atom | Length/Å   | Atom | Atom | Length/Å |
|------|------|------------|------|------|----------|
| Tc1  | C12  | 2.3689(6)  | N2   | C3   | 1.333(3) |
| Tc1  | C11  | 2.4508(6)  | C6   | C5   | 1.385(3) |
| Tc1  | O1   | 1.8673(14) | C16  | C17  | 1.511(3) |
| Tc1  | O2   | 1.6743(14) | C16  | C15  | 1.523(3) |
| Tc1  | N3   | 2.1340(19) | C9   | C10  | 1.521(3) |
| Tc1  | N1   | 2.1501(19) | C10  | C11  | 1.524(3) |
| O1   | C9   | 1.425(3)   | C12  | C13  | 1.520(3) |
| N3   | C5   | 1.344(3)   | C12  | C11  | 1.523(3) |
| N3   | C8   | 1.351(3)   | C13  | C14  | 1.522(3) |
| N1   | C1   | 1.343(3)   | C17  | C18  | 1.517(3) |
| N1   | C4   | 1.348(3)   | C15  | C14  | 1.524(3) |
| N4   | C6   | 1.336(3)   | C1   | C2   | 1.378(3) |
| N4   | C7   | 1.337(3)   | C8   | C7   | 1.382(3) |
| N2   | C2   | 1.339(3)   | C4   | C3   | 1.383(3) |

**Table S39.** Bond Angles for **10**.

| Atom | Atom | Atom | Angle/°    | Atom | Atom | Atom | Angle/°    |
|------|------|------|------------|------|------|------|------------|
| C12  | Tc1  | C11  | 175.11(2)  | C4   | N1   | Tc1  | 122.33(15) |
| O1   | Tc1  | C12  | 91.36(5)   | C6   | N4   | C7   | 115.8(2)   |
| O1   | Tc1  | C11  | 83.85(5)   | C3   | N2   | C2   | 115.8(2)   |
| O1   | Tc1  | N3   | 90.79(7)   | N4   | C6   | C5   | 122.6(2)   |
| O1   | Tc1  | N1   | 88.36(7)   | N3   | C5   | C6   | 120.9(2)   |
| O2   | Tc1  | C12  | 98.18(5)   | C17  | C16  | C15  | 112.9(2)   |
| O2   | Tc1  | C11  | 86.65(5)   | O1   | C9   | C10  | 109.95(18) |
| O2   | Tc1  | O1   | 170.25(7)  | C9   | C10  | C11  | 113.29(19) |
| O2   | Tc1  | N3   | 91.38(7)   | C13  | C12  | C11  | 113.8(2)   |
| O2   | Tc1  | N1   | 89.66(7)   | C12  | C13  | C14  | 114.7(2)   |
| N3   | Tc1  | C12  | 89.01(5)   | C16  | C17  | C18  | 115.3(2)   |
| N3   | Tc1  | C11  | 90.11(5)   | C16  | C15  | C14  | 115.3(2)   |
| N3   | Tc1  | N1   | 178.53(7)  | C13  | C14  | C15  | 113.3(2)   |
| N1   | Tc1  | C12  | 89.81(5)   | C12  | C11  | C10  | 112.91(19) |
| N1   | Tc1  | C11  | 91.00(5)   | N1   | C1   | C2   | 121.4(2)   |
| C9   | O1   | Tc1  | 147.84(13) | N3   | C8   | C7   | 120.4(2)   |
| C5   | N3   | Tc1  | 121.74(14) | N2   | C2   | C1   | 122.5(2)   |
| C5   | N3   | C8   | 117.19(19) | N1   | C4   | C3   | 120.9(2)   |

|    |    |     |            |    |    |    |          |
|----|----|-----|------------|----|----|----|----------|
| C8 | N3 | Tc1 | 121.07(15) | N2 | C3 | C4 | 122.8(2) |
| C1 | N1 | Tc1 | 121.12(15) | N4 | C7 | C8 | 123.1(2) |
| C1 | N1 | C4  | 116.5(2)   |    |    |    |          |

**Table S40.** Hydrogen Bonds for **10**.

| D  | H   | A               | d(D-H)/Å | d(H-A)/Å | d(D-A)/Å | D-H-A/°   |
|----|-----|-----------------|----------|----------|----------|-----------|
| C9 | H9A | N2 <sup>1</sup> | 0.97(2)  | 2.55(2)  | 3.438(3) | 151.6(19) |
| C6 | H6  | N4 <sup>2</sup> | 0.93(3)  | 2.56(3)  | 3.233(3) | 130(2)    |

<sup>1</sup>-1+X,-1+Y,+Z; <sup>2</sup>-X,-Y,-Z

**Table S41.** Torsion Angles for **10**.

| A   | B   | C   | D   | Angle/°     | A   | B   | C   | D   | Angle/°   |
|-----|-----|-----|-----|-------------|-----|-----|-----|-----|-----------|
| Tc1 | O1  | C9  | C10 | -170.83(19) | C5  | N3  | C8  | C7  | 0.4(3)    |
| Tc1 | N3  | C5  | C6  | -179.12(16) | C16 | C15 | C14 | C13 | -179.8(2) |
| Tc1 | N3  | C8  | C7  | 179.60(17)  | C9  | C10 | C11 | C12 | -178.6(2) |
| Tc1 | N1  | C1  | C2  | 178.87(18)  | C12 | C13 | C14 | C15 | 178.8(2)  |
| Tc1 | N1  | C4  | C3  | -179.63(16) | C13 | C12 | C11 | C10 | -177.4(2) |
| C12 | Tc1 | O1  | C9  | -174.2(3)   | C17 | C16 | C15 | C14 | 178.9(2)  |
| C11 | Tc1 | O1  | C9  | 6.7(3)      | C15 | C16 | C17 | C18 | 179.5(2)  |
| O1  | C9  | C10 | C11 | 178.8(2)    | C11 | C12 | C13 | C14 | 179.1(2)  |
| N3  | Tc1 | O1  | C9  | 96.7(3)     | C1  | N1  | C4  | C3  | 0.9(3)    |
| N3  | C8  | C7  | N4  | -0.6(4)     | C8  | N3  | C5  | C6  | 0.1(3)    |
| N1  | Tc1 | O1  | C9  | -84.5(3)    | C2  | N2  | C3  | C4  | -1.0(3)   |
| N1  | C1  | C2  | N2  | 1.2(4)      | C4  | N1  | C1  | C2  | -1.7(3)   |
| N1  | C4  | C3  | N2  | 0.4(3)      | C3  | N2  | C2  | C1  | 0.2(3)    |
| N4  | C6  | C5  | N3  | -0.4(3)     | C7  | N4  | C6  | C5  | 0.2(3)    |
| C6  | N4  | C7  | C8  | 0.3(3)      |     |     |     |     |           |

## Hirshfeld surface analysis and DFT colculations part

**Table S42.** Energies (kJ/mol) of intermolecular interactions for structure **1**.

| N | Symop             | R     | Electron Density | E_ele | E_pol | E_dis | E_rep | E_tot |
|---|-------------------|-------|------------------|-------|-------|-------|-------|-------|
| 2 | x, y, z           | 7.01  | HF/3-21G         | -9.1  | -4.2  | -8.6  | 4.0   | -16.5 |
| 1 | -                 | 6.95  | HF/3-21G         | 0.0   | nan   | 0.0   | 0.0   | nan   |
| 2 | x, y, z           | 11.88 | HF/3-21G         | 3.4   | -0.4  | -2.0  | 0.0   | 1.4   |
| 2 | x, -y+1/2, z+1/2  | 9.37  | HF/3-21G         | -10.8 | -4.6  | -12.4 | 11.0  | -16.3 |
| 2 | -x, y+1/2, -z+1/2 | 6.91  | HF/3-21G         | -10.6 | -9.2  | -43.2 | 31.8  | -29.9 |
| 1 | -x, -y, -z        | 7.35  | HF/3-21G         | -45.2 | -12.8 | -26.3 | 25.6  | -57.3 |
| 1 | -                 | 2.00  | HF/3-21G         | -10.6 | -9.2  | -43.2 | 31.8  | -29.9 |
| 1 | -                 | 5.51  | HF/3-21G         | 3.4   | -0.4  | -2.0  | 0.0   | 1.4   |
| 1 | -                 | 8.03  | HF/3-21G         | 0.5   | -0.1  | -2.8  | 0.0   | -2.1  |

|                                                  |                   |       |          |       |       |        |       |       |
|--------------------------------------------------|-------------------|-------|----------|-------|-------|--------|-------|-------|
| 2                                                | x, -y+1/2, z+1/2  | 10.63 | HF/3-21G | -2.0  | -1.4  | -8.3   | 4.3   | -6.9  |
| 2                                                | -x, y+1/2, -z+1/2 | 6.97  | HF/3-21G | -49.1 | -14.9 | -49.5  | 44.0  | -68.6 |
| 1                                                | -x, -y, -z        | 8.83  | HF/3-21G | 1.0   | -1.0  | -10.4  | 6.7   | -3.5  |
| 1                                                | -x, -y, -z        | 8.88  | HF/3-21G | -36.2 | -8.6  | -13.6  | 29.2  | -31.0 |
| Energy Model                                     |                   |       |          | k_ele | k_pol | k_disp | k_rep |       |
| CE-HF ... HF/3-21G electron densities            |                   |       |          | 1.019 | 0.651 | 0.901  | 0.811 |       |
| CE-B3LYP ... B3LYP/6-31G(d,p) electron densities |                   |       |          | 1.057 | 0.740 | 0.871  | 0.618 |       |

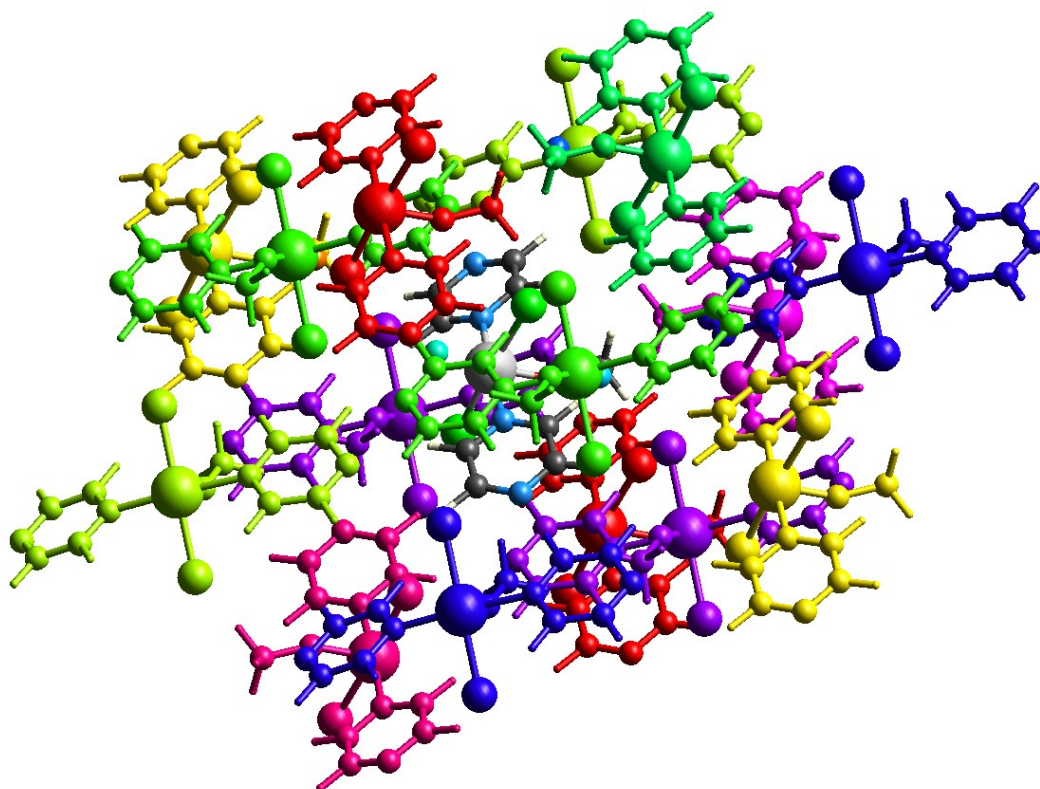

**Figure S1.** Cluster of molecules around the selected molecule of **1** (3.8 Å) for generate energies.

**Table S43.** Energies (kJ/mol) of intermolecular interactions for structure **5**.

| N | Symop                 | R     | Electron Density | E_ele | E_pol | E_dis | E_rep | E_tot |
|---|-----------------------|-------|------------------|-------|-------|-------|-------|-------|
| 2 | x+1/2, -y+1/2, z+1/2  | 9.94  | HF/3-21G         | -27.1 | -6.5  | -14.4 | 17.1  | -31.0 |
| 1 | -x, -y, -z            | 8.01  | HF/3-21G         | -18.3 | -9.0  | -18.3 | 20.8  | -24.2 |
| 1 | -                     | 8.49  | HF/3-21G         | 0.0   | nan   | 0.0   | 0.0   | nan   |
| 2 | -x+1/2, y+1/2, -z+1/2 | 7.12  | HF/3-21G         | 4.6   | -9.6  | -31.8 | 16.0  | -17.1 |
| 2 | x+1/2, -y+1/2, z+1/2  | 8.95  | HF/3-21G         | -27.7 | -6.8  | -26.7 | 19.0  | -41.4 |
| 1 | -x, -y, -z            | 12.68 | HF/3-21G         | -1.7  | -0.7  | -8.6  | 0.0   | -10.0 |

|                                                  |                       |       |          |       |       |        |       |       |
|--------------------------------------------------|-----------------------|-------|----------|-------|-------|--------|-------|-------|
| 2                                                | x, y, z               | 8.82  | HF/3-21G | -22.9 | -11.4 | -38.1  | 33.0  | -38.3 |
| 1                                                | -x, -y, -z            | 10.30 | HF/3-21G | -4.1  | -1.0  | -33.5  | 16.4  | -21.6 |
| 2                                                | -x+1/2, y+1/2, -z+1/2 | 10.18 | HF/3-21G | -0.9  | -0.4  | -16.7  | 6.8   | -10.7 |
| 1                                                | -x, -y, -z            | 6.86  | HF/3-21G | -15.8 | -14.0 | -31.1  | 26.1  | -32.1 |
| 1                                                | -                     | 2.55  | HF/3-21G | -27.1 | -6.5  | -14.4  | 17.1  | -31.0 |
| 1                                                | -                     | 4.71  | HF/3-21G | -18.3 | -9.0  | -18.3  | 20.8  | -24.2 |
| 1                                                | -                     | 6.44  | HF/3-21G | -1.7  | -0.7  | -8.6   | 0.0   | -10.0 |
| Energy Model                                     |                       |       |          | k_ele | k_pol | k_disp | k_rep |       |
| CE-HF ... HF/3-21G electron densities            |                       |       |          | 1.019 | 0.651 | 0.901  | 0.811 |       |
| CE-B3LYP ... B3LYP/6-31G(d,p) electron densities |                       |       |          | 1.057 | 0.740 | 0.871  | 0.618 |       |

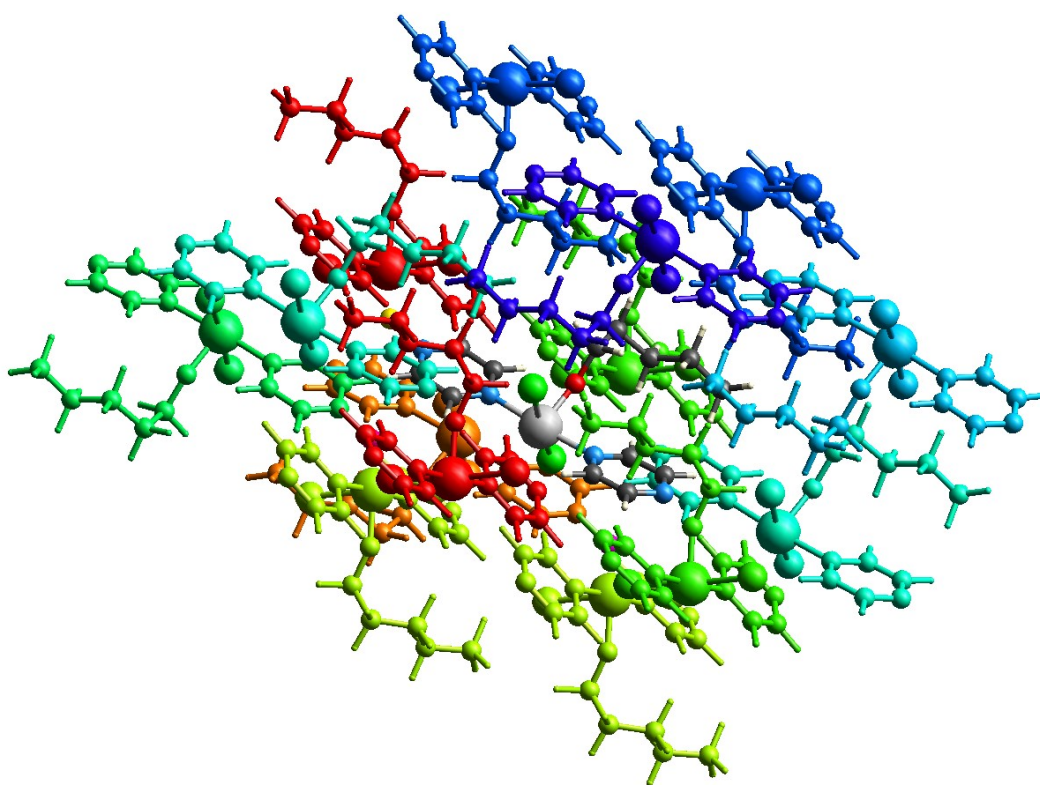

**Figure S2.** Cluster of molecules around the selected molecule of **5** (3.8 Å) for generate energies.

**Table S44.** Energies (kJ/mol) of intermolecular interactions for structure **1**.

|  | N | Symop      | R     | Electron Density | E_ele | E_pol | E_dis | E_rep | E_tot |
|--|---|------------|-------|------------------|-------|-------|-------|-------|-------|
|  | 1 | -x, -y, -z | 13.99 | HF/3-21G         | -6.5  | -4.1  | -11.4 | 0.0   | -19.6 |
|  | 2 | x, y, z    | 8.59  | HF/3-21G         | -10.7 | -7.4  | -47.0 | 32.3  | -32.0 |
|  | 1 | -x, -y, -z | 10.80 | HF/3-21G         | -33.1 | -14.7 | -29.8 | 27.0  | -48.3 |

|                                                  |            |       |          |       |       |       |        |       |
|--------------------------------------------------|------------|-------|----------|-------|-------|-------|--------|-------|
| 2                                                | x, y, z    | 6.88  | HF/3-21G | -42.3 | -22.0 | -69.4 | 54.8   | -75.5 |
| 1                                                | -x, -y, -z | 13.22 | HF/3-21G | -23.1 | -4.1  | -36.9 | 0.0    | -59.5 |
| 1                                                | -          | 5.09  | HF/3-21G | 0.0   | nan   | 0.0   | 0.0    | nan   |
| 1                                                | -x, -y, -z | 12.01 | HF/3-21G | 4.7   | -0.8  | -19.2 | 0.0    | -13.0 |
| 1                                                | -x, -y, -z | 17.25 | HF/3-21G | 20.9  | -0.1  | -36.0 | 0.0    | -11.2 |
| 1                                                | -x, -y, -z | 14.29 | HF/3-21G | 29.4  | -2.6  | -68.6 | 0.0    | -33.6 |
| 1                                                | x, y, z    | 13.55 | HF/3-21G | 1.6   | -0.2  | -1.7  | 0.0    | 0.0   |
| 1                                                | -x, -y, -z | 18.95 | HF/3-21G | -6.0  | -0.0  | -13.1 | 0.0    | -17.9 |
| 2                                                | x, y, z    | 7.64  | HF/3-21G | -27.4 | -10.1 | -18.8 | 16.9   | -37.7 |
| 1                                                | -          | 7.23  | HF/3-21G | 7.4   | -1.5  | -7.3  | 0.4    | 0.3   |
| 1                                                | -          | 4.30  | HF/3-21G | -42.3 | -22.0 | -69.4 | 54.8   | -75.5 |
| Energy Model                                     |            |       |          |       | k_ele | k_pol | k_disp | k_rep |
| CE-HF ... HF/3-21G electron densities            |            |       |          |       | 1.019 | 0.651 | 0.901  | 0.811 |
| CE-B3LYP ... B3LYP/6-31G(d,p) electron densities |            |       |          |       | 1.057 | 0.740 | 0.871  | 0.618 |

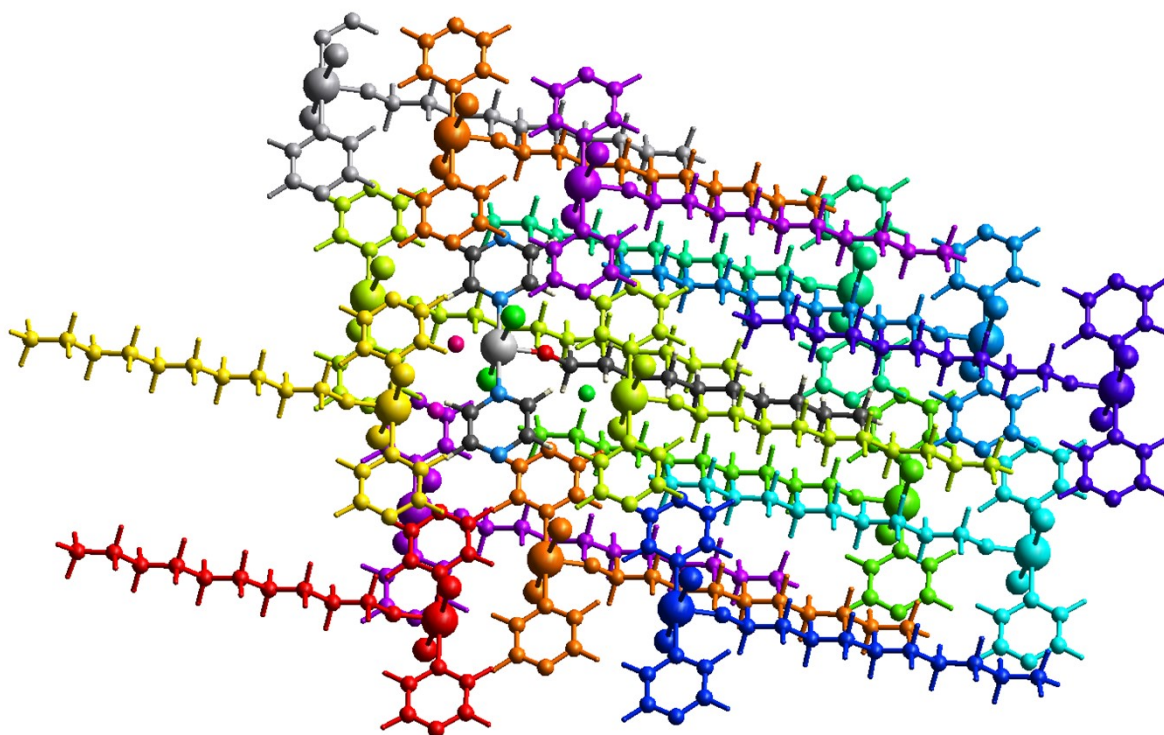

**Figure S3.** Cluster of molecules around the selected molecule of **10** (3.8 Å) for generate energies.

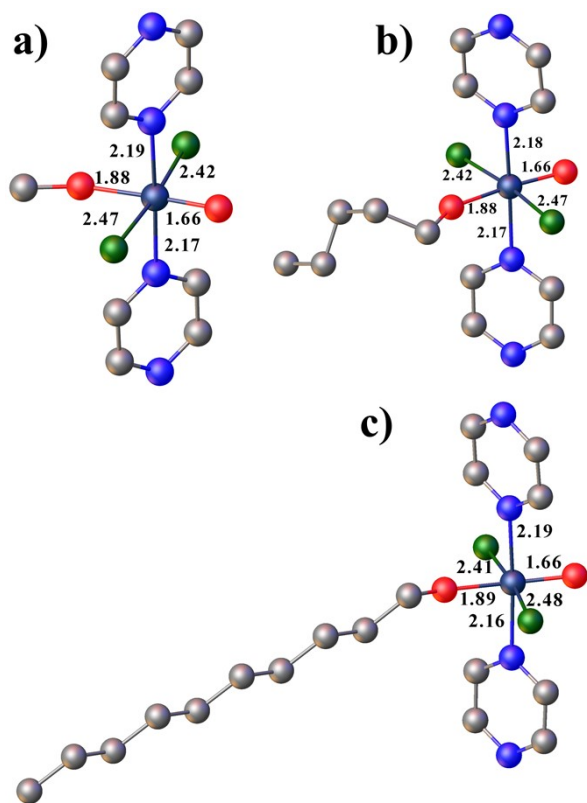

**Figure S4.** DFT optimized models of structures **1(a)**, **5(b)** and **10(c)**. Hydrogen atoms omitted for clarity. Distances are given in angstroms.

## pXRD part

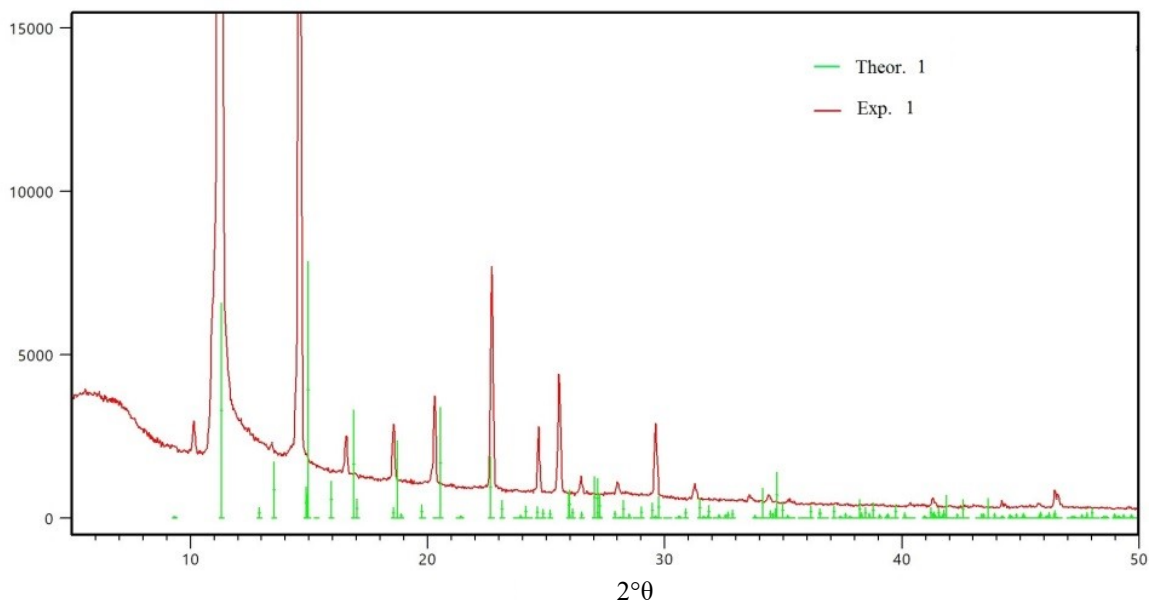

**Figure S5.1.** pXRD of compound **1**.

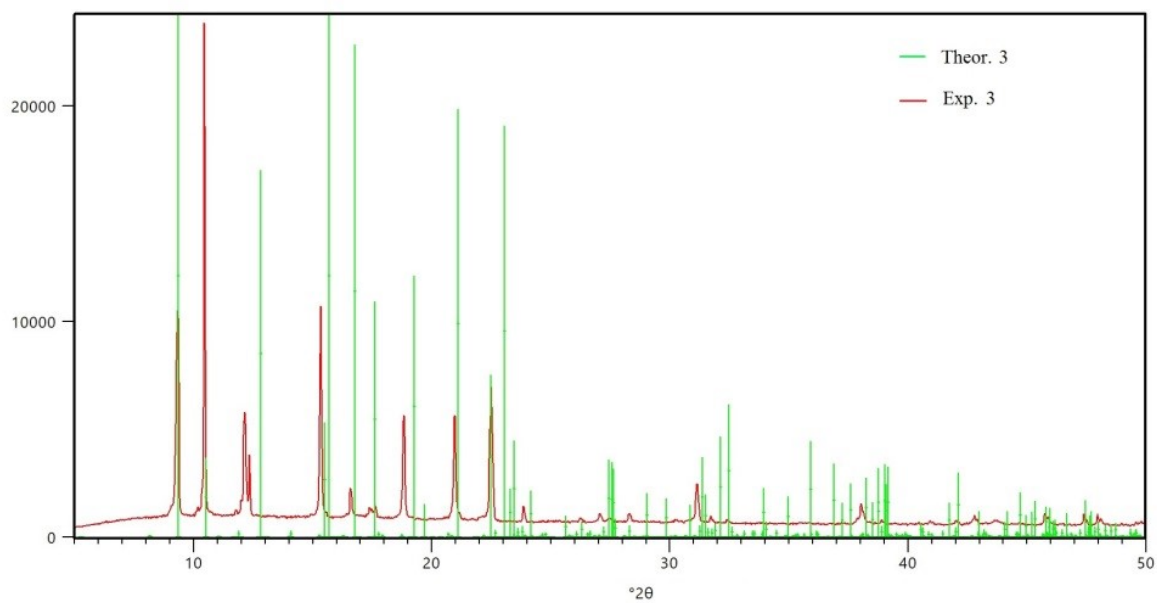

**Figure S5.2.** pXRD of compound 3.

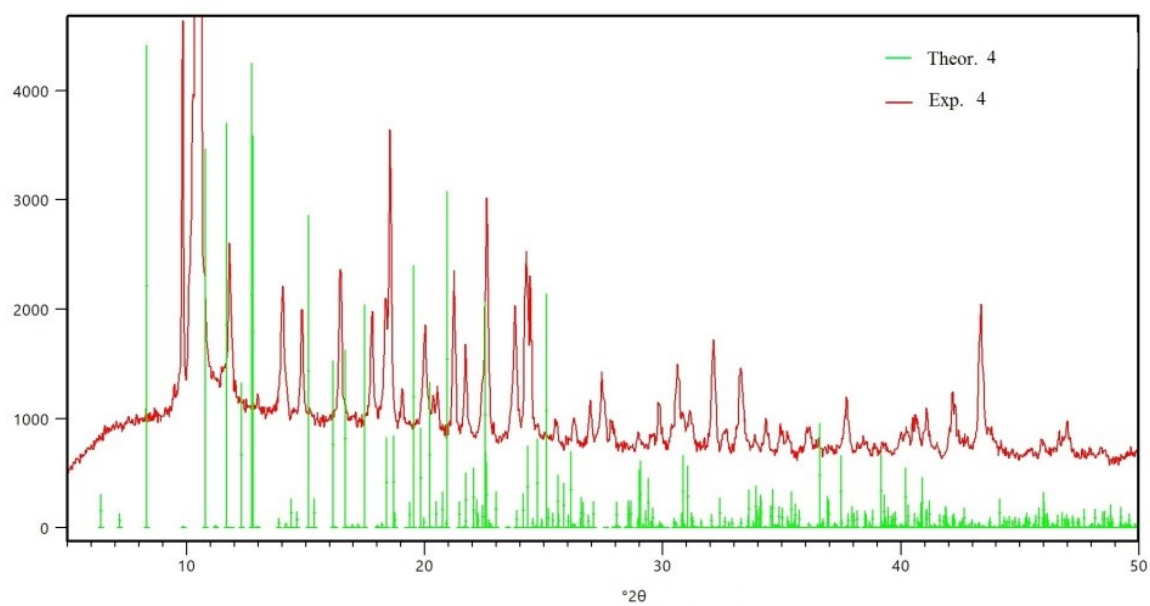

**Figure S5.3.** pXRD of compound 4.



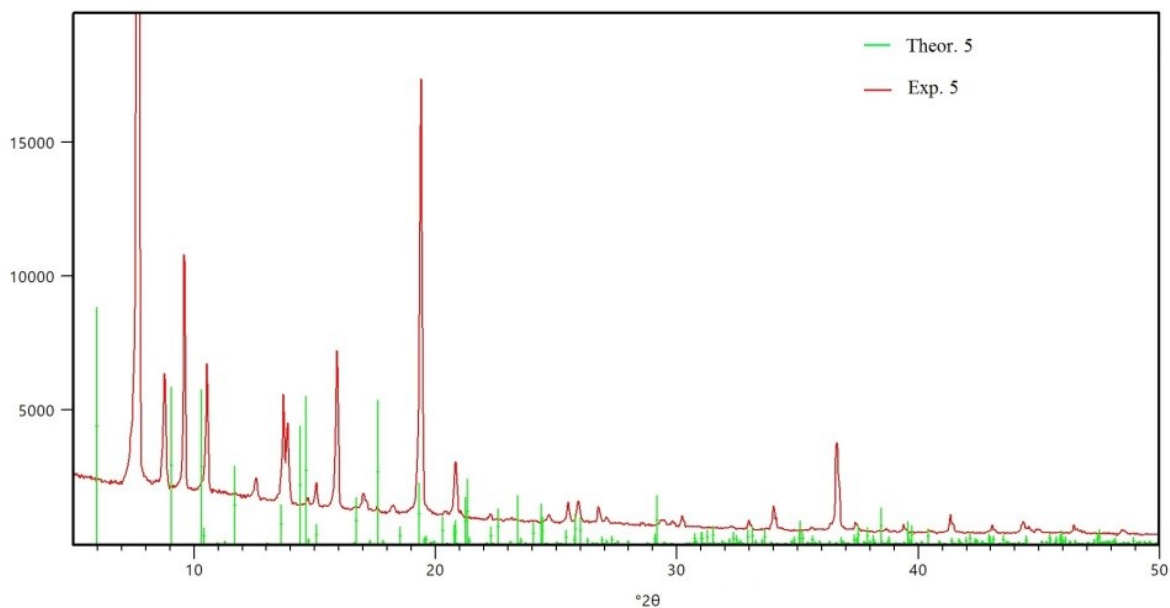

**Figure S5.4.** pXRD of compound **5**.

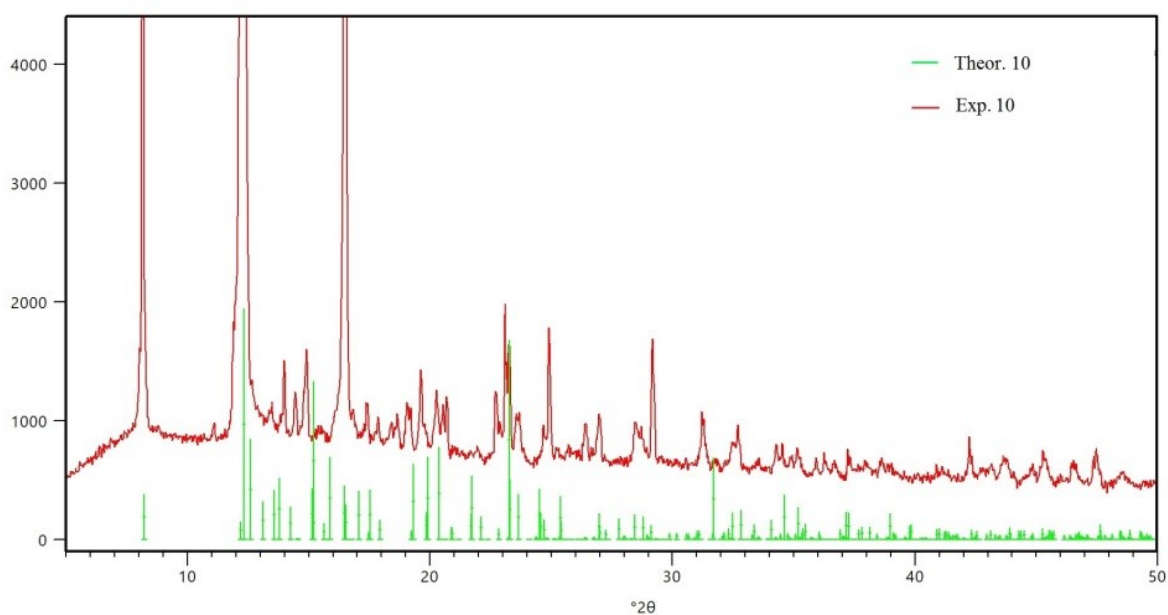

**Figure S5.5.** pXRD of compound **10**.

### **DTA and MALDI-LI mass-spectroscopy part**

Heating was carried out in a reducing atmosphere (Ar + 1.5% H<sub>2</sub>) to avoid the formation of volatile technetium compounds. The thermal decomposition of homologous complexes occurs in the temperature range 130 - 400°C and includes in at least 3 stages, the waves of which are shown in the thermolysis curves of all complexes. According to pXRD data, the final Tc-containing decomposition product is a mixture of metal and its carbide; the residual mass after heating to 1000°C does not depend on the composition of

the complex and is in the range of 47-55%. PXRD results for the non-covalent reductive thermolysis residue of **7** are shown in the figure S8 in SI.

The first stage of decomposition for all compounds corresponds to two sequential processes, as can be clearly seen in the curves of compounds **3** and **7**. For the compound **1**, apparently due to the rather high initial temperature of decomposition, both stages occur almost simultaneously and there is no noticeable response in the curves TG and DTA. The total mass loss for all compounds is about 14-16%. Presumably the first stage is the sequential elimination of one oxygen atom and one chlorine atom. The onset of decomposition is accompanied by an endothermic effect (Figure S6 and S7 in SI) and presumably occurs with a change in the oxidation state of the metal to a lower one. The first stage thermolysis temperature ranges are (°C): **1**- 158 – 188; **3**- 144 – 185; **7**- 130 – 188; **9**- 116 – 189. The second stage of thermolysis occurs with a mass loss of the order of 7-10%, which corresponds to the second chlorine atom elimination. The process is accompanied by an exothermic effect. Temperature ranges of the second stage of thermolysis are (°C): **1**- 259 – 280; **3**- 225 – 254; **7**- 198 – 230; **9**- 206 – 240. The third stage of decomposition probably corresponds to several processes occurring sequentially. The mass loss ranged from 24% for **1** and 31% for **3**, the compounds **7** and **9** continued to lose mass until the end of the experiment. The third stage probably corresponds to the decomposition of organic components, the reduction of technetium to a metallic form and is accompanied by an exothermic effect. The decomposition of pyrazine and heavy aliphatic residues under conditions of oxygen deficiency leads to the accumulation of carbon in the residue. Heating metallic technetium in the presence of carbon residues leads to the formation of a carbide phase, detected by X-ray phase analysis. The third stage of decomposition of the compounds **1** and **3** occurs in the temperature ranges (°C): **1**- 333 – 420; **3**- 316 – 560. The described temperature ranges for the thermolysis of **1** roughly coincide with the temperature ranges earlier shown in the <sup>1</sup>.

The approximately equal loss of mass at all stages of decomposition for all complexes suggests that the cleavage of the Tc-O-R bond and the elimination of the O-R group, oddly enough, is one of the last to occur. This statement is also supported by the fact that the stages of thermolysis of the complexes differ in the temperatures at which the reaction begins and ends, which indicates differences in the composition of the decomposition products.

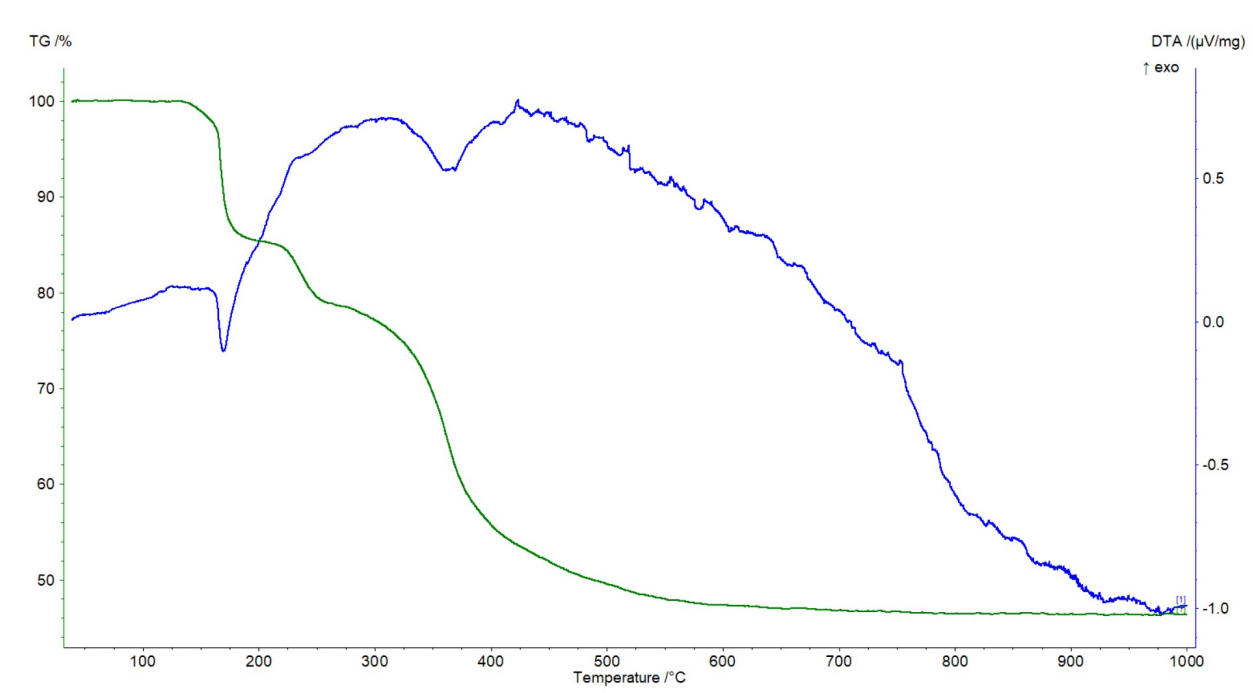

**Figure S6.** TG and DTA cursives of compound **3**

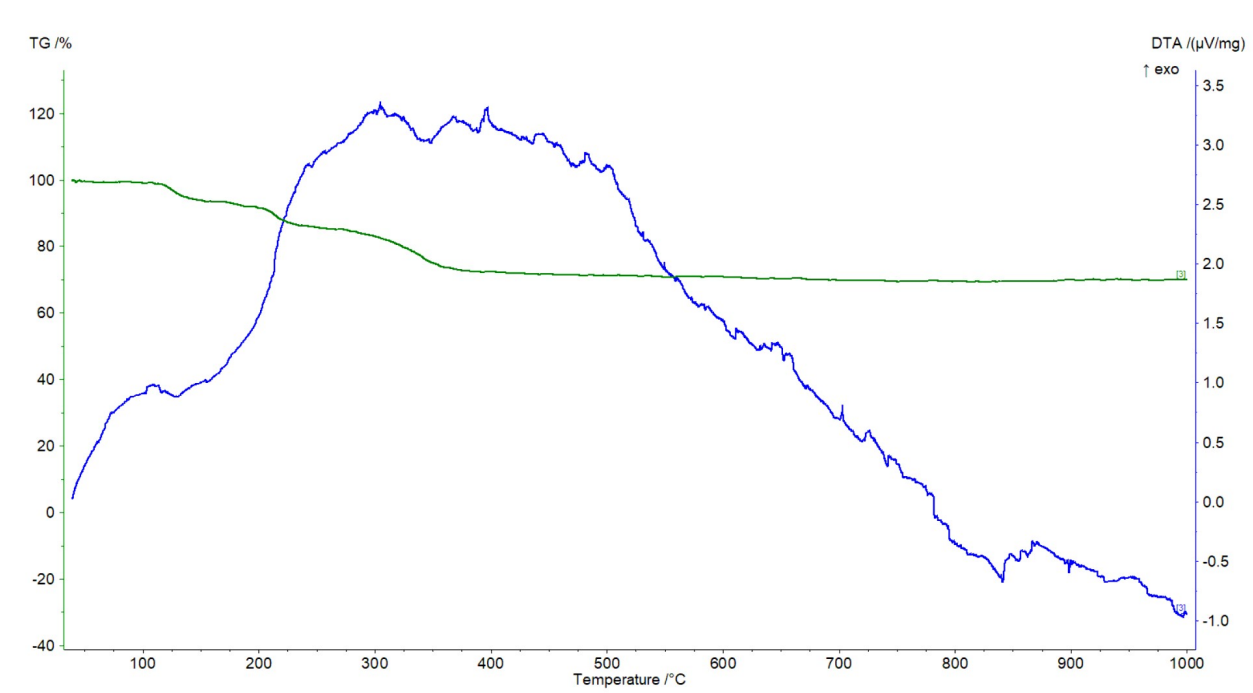

**Figure S7.** TG and DTA cursives of compound **9**

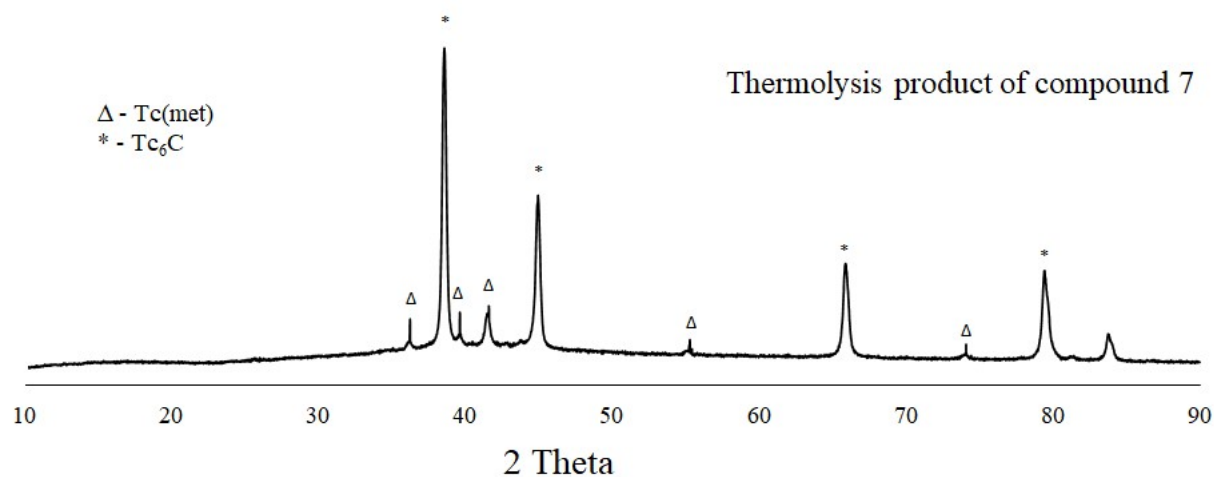

**Figure S8.** PXRD of product of thermolysis of **7**

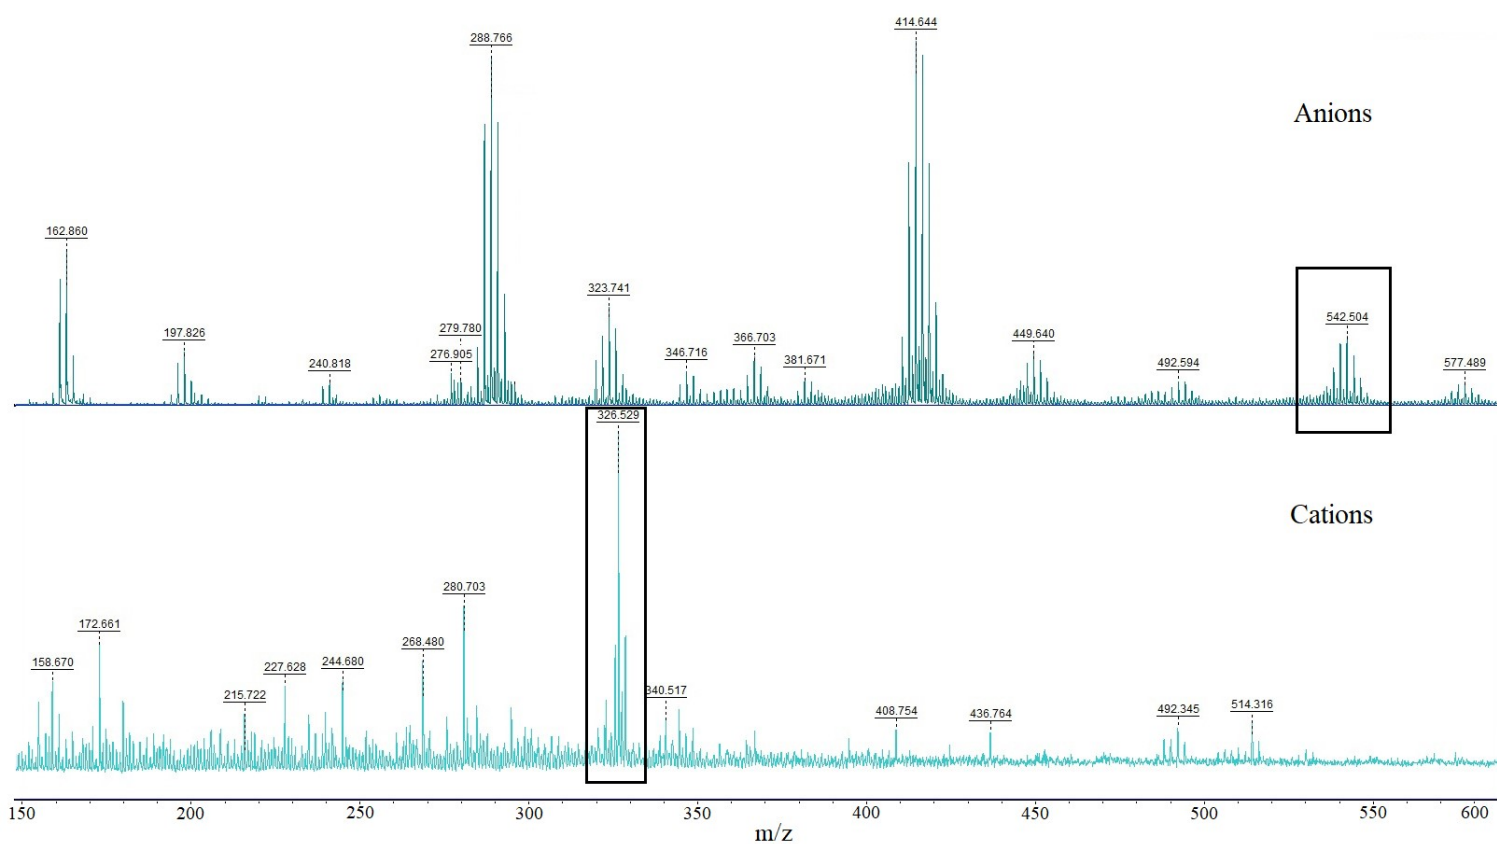

**Figure S9.** MALDI-LI mass-spectroscopy dried methanol solution of **1**

From residual organic signals it was possible to identify a multiplet with mass 542.504 (calc. 542.514 a.m.u.), presumably corresponding to a molecular anion  $[\text{Tc}(\text{V})\text{OCl}_3(\text{N}_2\text{C}_4\text{H}_4)\times 2\text{Cl}_2\times \text{ClO}_4]^-$  and a multiplet with mass 326.529 (Calc. 326.64 a.m.u.) of the cation  $[\text{Tc}(\text{V})\text{O}_2\text{Cl}(\text{N}_2\text{C}_4\text{H}_4)_2\text{OH}]^+$  (the proposed structural formulas are given in the table S45). In the light mass region, the ions did not contain organic fragments from either methanol or chloroform precipitates. In **1**, also no particles with a fragment O-R were detected. The LI spectra are shown in Figure S9.

**Table S45.** Correspondence of the peaks recorded in the cationic and anionic mass spectra (LI-MALDI) to the expected formulas of molecular ions.

|       | m/z, a.m.u. | possible formula | structural                                                                          |
|-------|-------------|------------------|-------------------------------------------------------------------------------------|
| Found | 326.529     |                  |                                                                                     |
| Calc. | 326.64      |                  |  |
| Found | 542,504     |                  |                                                                                     |
| Calc. | 542.514     |                  |   |

## IR and UV-Vis spectroscopy part

Infrared spectroscopy (ATR) of **3**, **4**, **5**, **6**, **7**, **9** and **10** expectedly showed similar results (Figure S10). The list of peaks for each of the listed compounds is given in the table S46. The bulk of the peaks correspond to vibrations of organic fragments of the aliphatic substituent ( $\text{cm}^{-1}$ ):  $\text{CH}_2$  720-740 ( $\delta$ ), 2915-2940 ( $\nu_{\text{as}}$ ) 2845-2870 ( $\nu_{\text{s}}$ ) 1440-1480 ( $\delta$ );  $\text{CH}_3$  1370-1385 ( $\delta_{\text{s}}$ ), 2950-2975 ( $\nu_{\text{as}}$ ), 2860-2885 ( $\nu_{\text{s}}$ ), 1435-1470 ( $\delta_{\text{as}}$ ), C-O 1050-1260; pyrazine: CH 3030-3080 ( $\nu_{\text{CH}}$ ); aromatic ring vibrations 1575-1600, 1475-1525, 1575-1590  $\text{cm}^{-1}$ . Pyrazine vibrations are mostly consistent with literature data 2,3. Tc=O vibrations are in ranges 920-890, 850-840  $\text{cm}^{-1}$ . Unfortunately, the vibrations of the Tc-Cl and Tc-N bonds lie in the short-wave region up to 600  $\text{cm}^{-1}$  and are not displayed on the spectrum. There is no shift in the absorption bands with increasing length of the hydrocarbon substituent.

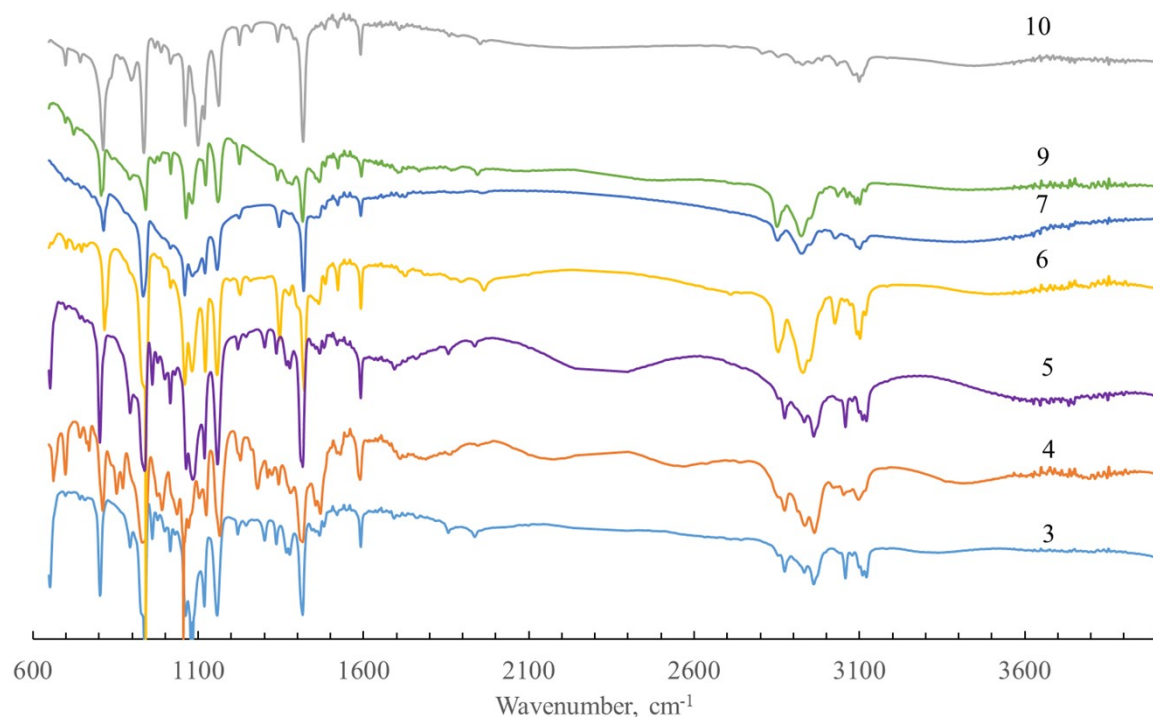

**Figure S10.** Infrared spectroscopy of the compounds **3, 4, 5, 6, 7, 9, 10**.

**Table S46.** The list of peaks IR-spectrum of compounds **3, 4, 5, 6, 7, 9, 10**

| <b>3</b>         |                 | <b>4</b>         |                    | <b>5</b>         |                     | <b>6</b>         |                     | <b>7</b>         |                     | <b>9</b>         |                     | <b>10</b>        |                     |
|------------------|-----------------|------------------|--------------------|------------------|---------------------|------------------|---------------------|------------------|---------------------|------------------|---------------------|------------------|---------------------|
| cm <sup>-1</sup> | Intens,<br>a.u. | cm <sup>-1</sup> | Intens,<br>a.u.+50 | cm <sup>-1</sup> | Intens,<br>a.u.+100 | cm <sup>-1</sup> | Intens,<br>a.u.+150 | cm <sup>-1</sup> | Intens,<br>a.u.+200 | cm <sup>-1</sup> | Intens,<br>a.u.+250 | cm <sup>-1</sup> | Intens,<br>a.u.+300 |
| 652              | 34              | 661              | 104                | 652              | 165                 | 661              | 261                 | 698              | 301                 | 698              | 340                 | 698              | 377                 |
| 698              | 94              | 698              | 108                | 663              | 209                 | 702              | 257                 | 746              | 296                 | 723              | 332                 | 744              | 380                 |
| 742              | 91              | 742              | 133                | 698              | 343                 | 727              | 256                 | 814              | 268                 | 806              | 291                 | 812              | 321                 |
| 758              | 91              | 760              | 128                | 744              | 211                 | 746              | 255                 | 821              | 284                 | 812              | 295                 | 835              | 369                 |
| 802              | 28              | 812              | 85                 | 758              | 208                 | 762              | 258                 | 879              | 280                 | 841              | 316                 | 866              | 382                 |
| 893              | 60              | 839              | 114                | 802              | 129                 | 816              | 203                 | 933              | 225                 | 893              | 302                 | 897              | 367                 |
| 941              | 0               | 852              | 95                 | 814              | 187                 | 823              | 219                 | 991              | 264                 | 931              | 296                 | 935              | 320                 |
| 960              | 65              | 871              | 99                 | 868              | 188                 | 895              | 240                 | 1016             | 257                 | 941              | 282                 | 968              | 389                 |
| 978              | 78              | 893              | 100                | 893              | 148                 | 935              | 166                 | 1059             | 226                 | 968              | 313                 | 987              | 386                 |
| 999              | 70              | 941              | 0                  | 937              | 110                 | 941              | 0                   | 1082             | 238                 | 983              | 315                 | 1016             | 378                 |
| 1014             | 57              | 960              | 107                | 960              | 167                 | 976              | 251                 | 1095             | 242                 | 1016             | 306                 | 1061             | 338                 |
| 1030             | 68              | 976              | 94                 | 978              | 181                 | 993              | 245                 | 1120             | 240                 | 1062             | 277                 | 1088             | 357                 |
| 1057             | 62              | 991              | 85                 | 999              | 171                 | 1016             | 231                 | 1155             | 243                 | 1082             | 286                 | 1099             | 324                 |
| 1080             | 0               | 1014             | 95                 | 1030             | 174                 | 1053             | 163                 | 1224             | 277                 | 1120             | 299                 | 1118             | 342                 |
| 1118             | 21              | 1035             | 82                 | 1062             | 112                 | 1082             | 176                 | 1344             | 271                 | 1161             | 288                 | 1163             | 351                 |
| 1157             | 15              | 1055             | 0                  | 1086             | 105                 | 1120             | 175                 | 1396             | 274                 | 1224             | 312                 | 1224             | 391                 |
| 1219             | 68              | 1070             | 73                 | 1118             | 118                 | 1157             | 173                 | 1419             | 229                 | 1340             | 302                 | 1259             | 399                 |
| 1244             | 74              | 1080             | 82                 | 1157             | 115                 | 1196             | 136                 | 1468             | 278                 | 1371             | 300                 | 1340             | 393                 |
| 1302             | 65              | 1103             | 92                 | 1219             | 190                 | 1226             | 226                 | 1483             | 283                 | 1383             | 299                 | 1365             | 402                 |
| 1336             | 62              | 1124             | 81                 | 1246             | 199                 | 1259             | 235                 | 1522             | 285                 | 1415             | 274                 | 1390             | 395                 |
| 1367             | 56              | 1161             | 71                 | 1300             | 191                 | 1344             | 215                 | 1552             | 291                 | 1468             | 301                 | 1417             | 327                 |
| 1377             | 55              | 1223             | 121                | 1336             | 187                 | 1375             | 226                 | 1591             | 278                 | 1485             | 312                 | 1483             | 401                 |
| 1415             | 15              | 1259             | 124                | 1367             | 180                 | 1406             | 216                 | 1726             | 291                 | 1524             | 310                 | 1522             | 402                 |
| 1456             | 70              | 1280             | 99                 | 1375             | 178                 | 1423             | 166                 | 2851             | 262                 | 1552             | 318                 | 1552             | 408                 |
| 1466             | 68              | 1309             | 106                | 1415             | 113                 | 1464             | 220                 | 2924             | 523                 | 1593             | 304                 | 1591             | 384                 |
| 1481             | 74              | 1323             | 108                | 1468             | 188                 | 1485             | 233                 | 2955             | 260                 | 1711             | 307                 | 1709             | 401                 |
| 1520             | 81              | 1342             | 101                | 1479             | 191                 | 1522             | 230                 | 2984             | 268                 | 1942             | 305                 | 1952             | 391                 |

|      |    |      |     |      |     |      |     |      |     |      |      |      |     |
|------|----|------|-----|------|-----|------|-----|------|-----|------|------|------|-----|
| 1551 | 84 | 1371 | 100 | 1520 | 193 | 1551 | 247 | 3028 | 264 | 2851 | 271  | 2803 | 385 |
| 1591 | 60 | 1379 | 96  | 1551 | 194 | 1591 | 217 | 3090 | 258 | 2868 | 2881 | 2858 | 383 |
| 1853 | 70 | 1415 | 63  | 1591 | 158 | 1726 | 238 | 3100 | 256 | 2924 | 265  | 2907 | 379 |
| 1936 | 67 | 1456 | 88  | 1693 | 177 | 1965 | 229 | 3121 | 262 | 2951 | 277  | 2928 | 378 |
| 2853 | 54 | 1469 | 82  | 1859 | 189 | 2855 | 189 |      |     | 2984 | 293  | 2959 | 379 |
| 2874 | 44 | 1458 | 112 | 1934 | 192 | 2932 | 175 |      |     | 3034 | 291  | 2984 | 381 |
| 2912 | 44 | 1713 | 118 | 2855 | 158 | 2947 | 183 |      |     | 3059 | 291  | 3032 | 377 |
| 2961 | 35 | 2853 | 93  | 2872 | 145 | 2984 | 217 |      |     | 3088 | 286  | 3080 | 371 |
| 2972 | 41 | 2872 | 84  | 2932 | 142 | 3024 | 207 |      |     | 3100 | 286  | 3100 | 367 |
| 3057 | 39 | 2912 | 83  | 2961 | 133 | 3055 | 222 |      |     | 3121 | 295  | 3109 | 371 |
| 3076 | 55 | 2934 | 74  | 2974 | 141 | 3073 | 220 |      |     |      |      |      |     |
| 3098 | 47 | 2965 | 70  | 3057 | 139 | 3102 | 197 |      |     |      |      |      |     |
| 3109 | 41 | 3021 | 99  | 3076 | 156 | 3092 | 197 |      |     |      |      |      |     |
| 3121 | 40 | 3051 | 94  | 3105 | 147 | 3117 | 213 |      |     |      |      |      |     |
|      |    | 3096 | 91  | 3109 | 144 |      |     |      |     |      |      |      |     |
|      |    | 3117 | 97  | 3121 | 143 |      |     |      |     |      |      |      |     |

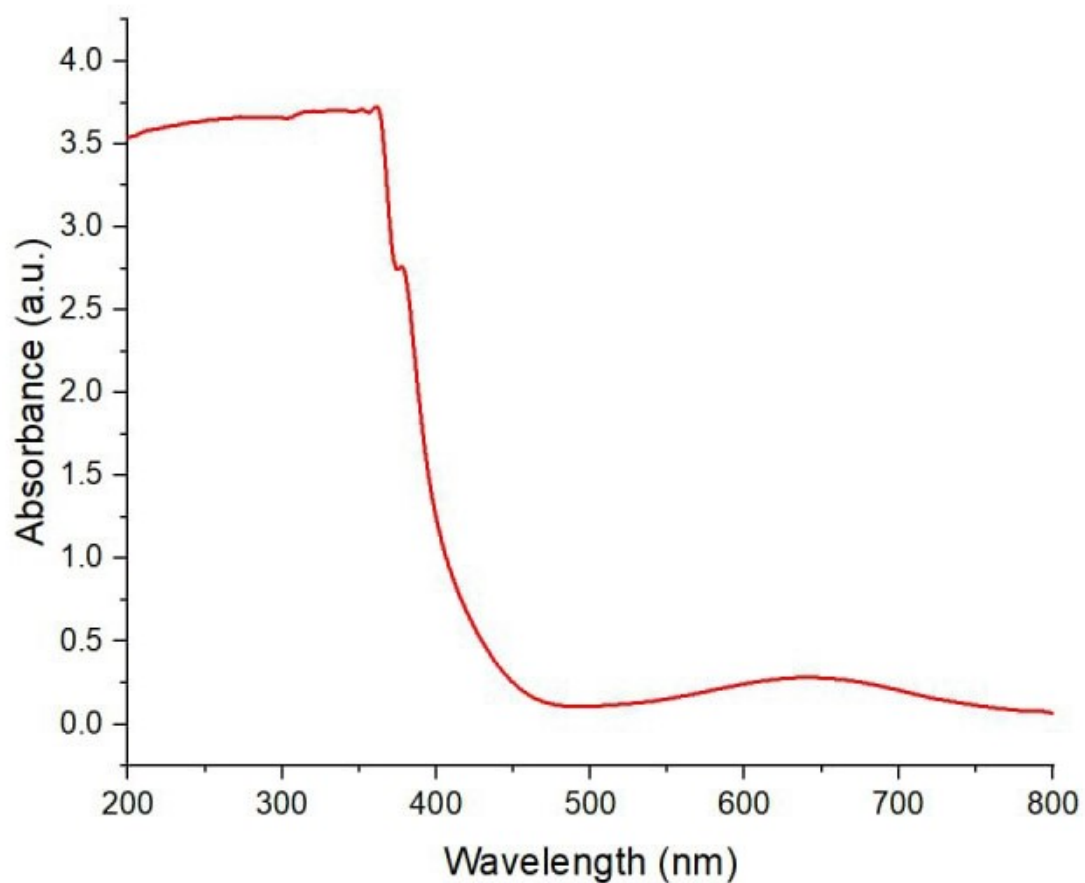

**Figure S11.** The full experimental spectrum of compound **3** in PrOH ( $c[\text{Tc}] = 5 \text{ mmol/l}$ ) at the moment crystal growth begins.

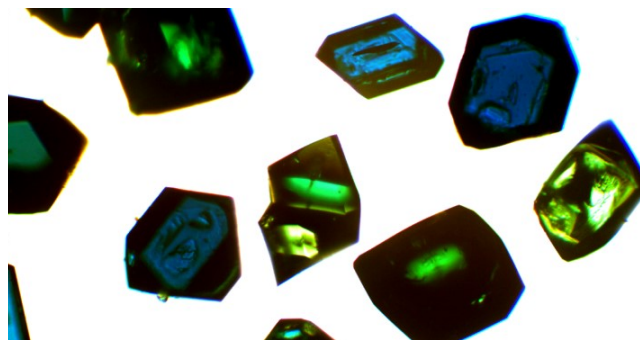

**Figure S12.** Photograph of crystals of compound **3**. Magnification 30x, polarized light.

### References:

- 1 A. P. Novikov and M. A. Volkov, *Int. J. Mol. Sci.*, 2022, **23**, 14034.
- 2 S. Breda, I. D. Reva, L. Lapinski, M. J. Nowak and R. Fausto, *J. Mol. Struct.*, 2006, **786**, 193–206.
- 3 S. Yoshida and M. Asai, *Chem. Pharm. Bull.*, 1959, **7**, 162–171.
